# Supplementary material for: Elucidating the Aromatic Properties of Covalent Organic Frameworks Surface for Enhanced Polar Solvent Adsorption
Source: MDPI journal article supplement (doi:10.3390/polym13111861), 2021-06-03
Supplement: s1 [file s1]

## Supplementary information

### Elucidating the Aromatic Properties of Covalent Organic Frameworks Surface for Enhanced Polar Solvent Adsorption

Mostafa Yousefzadeh Borzehandani<sup>1,2</sup>, Emilia Abdulmalek<sup>1,2</sup>, Mohd Basyaruddin Abdul Rahman<sup>1,2</sup> and Muhammad Alif Mohammad Latif<sup>1,3</sup> \*

<sup>1</sup> *Integrated Chemical BioPhysics Research, Faculty of Science, Universiti Putra Malaysia, 43400 UPM Serdang, Selangor, MALAYSIA*

<sup>2</sup> *Department of Chemistry, Faculty of Science, Universiti Putra Malaysia, 43400 UPM Serdang, Selangor, MALAYSIA*

<sup>3</sup> *Centre of Foundation Studies for Agricultural Science, Universiti Putra Malaysia, 43400 UPM Serdang, Selangor, MALAYSIA*

\*Corresponding author email address: [aliflatif@upm.edu.my](mailto:aliflatif@upm.edu.my)

#### Contents

##### SI.1. QM calculation

|                                                       |     |
|-------------------------------------------------------|-----|
| SI.1.1. Optimization and frequency calculations ..... | S2  |
| SI.1.2. HOMA parameters .....                         | S17 |
| SI.1.3. NICS-X-scan .....                             | S18 |
| SI.1.4. Atomic charges .....                          | S20 |

##### SI.2. MD simulation

|                                                  |     |
|--------------------------------------------------|-----|
| SI.2.1. Super cell and unit cell .....           | S22 |
| SI.2.2. Potential parameters .....               | S24 |
| SI.2.3. Total energy .....                       | S25 |
| SI.2.4. Radial distribution function (RDF) ..... | S26 |
| SI.2.5. Hydrogen bond (HB) interaction .....     | S30 |
| SI.2.6. Partial density .....                    | S31 |
| SI.2.7. Mean square displacement (MSD) .....     | S31 |
| References .....                                 | S32 |

### SI.1.1. Optimization and frequency calculation

Sum of electronic and zero-point energies (hartree) used for ASE, sum of electronic and thermal enthalpies (hartree) applied for  $\Delta H$  equations, and x, y, z coordinates (Å) for the optimized structures [1]:

#### COF-1

$$E_0 = E_{elec} + ZPE = -5601.440178$$

$$H = E + RT = -5601.334262$$

| Center<br>Number | Atomic<br>Number | Atomic<br>Type | Coordinates (Angstroms) |           |          |
|------------------|------------------|----------------|-------------------------|-----------|----------|
|                  |                  |                | X                       | Y         | Z        |
| 1                | 5                | 0              | 5.041166                | 6.341328  | 0.000000 |
| 2                | 5                | 0              | 8.012334                | 1.195113  | 0.000000 |
| 3                | 8                | 0              | 5.707193                | 7.535776  | 0.000000 |
| 4                | 8                | 0              | 9.379770                | 1.174686  | 0.000000 |
| 5                | 6                | 0              | 7.909599                | 3.768048  | 0.000000 |
| 6                | 6                | 0              | 7.229811                | 2.549671  | 0.000000 |
| 7                | 6                | 0              | 7.218025                | 4.965889  | 0.000000 |
| 8                | 6                | 0              | 5.822985                | 4.986364  | 0.000000 |
| 9                | 1                | 0              | 8.984512                | 3.773308  | 0.000000 |
| 10               | 1                | 0              | 7.760036                | 5.894161  | 0.000000 |
| 11               | 5                | 0              | 2.971169                | 7.536442  | 0.000000 |
| 12               | 8                | 0              | 3.672396                | 6.360777  | 0.000000 |
| 13               | 6                | 0              | 1.406826                | 7.536035  | 0.000000 |
| 14               | 6                | 0              | 0.691551                | 6.338153  | 0.000000 |
| 15               | 6                | 0              | -0.691551               | 6.338153  | 0.000000 |
| 16               | 6                | 0              | -1.406826               | 7.536035  | 0.000000 |
| 17               | 1                | 0              | 1.224311                | 5.404525  | 0.000000 |
| 18               | 5                | 0              | -2.971169               | 7.536442  | 0.000000 |
| 19               | 8                | 0              | -3.672396               | 6.360777  | 0.000000 |
| 20               | 1                | 0              | -1.224311               | 5.404525  | 0.000000 |
| 21               | 5                | 0              | 5.042358                | 8.733620  | 0.000000 |
| 22               | 8                | 0              | 3.672577                | 8.710462  | 0.000000 |
| 23               | 6                | 0              | 5.823110                | 10.085922 | 0.000000 |
| 24               | 6                | 0              | 5.144694                | 11.305109 | 0.000000 |
| 25               | 6                | 0              | 5.836455                | 12.503063 | 0.000000 |
| 26               | 6                | 0              | 7.231126                | 12.524677 | 0.000000 |
| 27               | 1                | 0              | 4.069579                | 11.311570 | 0.000000 |
| 28               | 5                | 0              | 8.017075                | 13.885981 | 0.000000 |
| 29               | 1                | 0              | 5.294405                | 13.431243 | 0.000000 |
| 30               | 6                | 0              | 5.143226                | 3.767977  | 0.000000 |
| 31               | 6                | 0              | 5.834777                | 2.570176  | 0.000000 |
| 32               | 1                | 0              | 4.068300                | 3.762547  | 0.000000 |
| 33               | 8                | 0              | 7.344793                | 0.000000  | 0.000000 |
| 34               | 1                | 0              | 5.292611                | 1.641978  | 0.000000 |
| 35               | 6                | 0              | 7.218164                | 10.107990 | 0.000000 |
| 36               | 6                | 0              | 7.909742                | 11.306050 | 0.000000 |
| 37               | 1                | 0              | 7.761317                | 9.180144  | 0.000000 |

|    |   |   |           |            |          |
|----|---|---|-----------|------------|----------|
| 38 | 1 | 0 | 8.984595  | 11.300711  | 0.000000 |
| 39 | 6 | 0 | 0.691574  | 8.733937   | 0.000000 |
| 40 | 6 | 0 | -0.691574 | 8.733937   | 0.000000 |
| 41 | 1 | 0 | 1.224475  | 9.667469   | 0.000000 |
| 42 | 8 | 0 | -3.672577 | 8.710462   | 0.000000 |
| 43 | 1 | 0 | -1.224475 | 9.667469   | 0.000000 |
| 44 | 5 | 0 | -8.017075 | 13.885981  | 0.000000 |
| 45 | 6 | 0 | -7.231126 | 12.524677  | 0.000000 |
| 46 | 6 | 0 | -5.836455 | 12.503063  | 0.000000 |
| 47 | 6 | 0 | -5.144694 | 11.305109  | 0.000000 |
| 48 | 6 | 0 | -5.823110 | 10.085922  | 0.000000 |
| 49 | 1 | 0 | -5.294405 | 13.431243  | 0.000000 |
| 50 | 5 | 0 | -5.042358 | 8.733620   | 0.000000 |
| 51 | 1 | 0 | -4.069579 | 11.311570  | 0.000000 |
| 52 | 6 | 0 | -7.909742 | 11.306050  | 0.000000 |
| 53 | 6 | 0 | -7.218164 | 10.107990  | 0.000000 |
| 54 | 1 | 0 | -8.984595 | 11.300711  | 0.000000 |
| 55 | 8 | 0 | -5.707193 | 7.535776   | 0.000000 |
| 56 | 1 | 0 | -7.761317 | 9.180144   | 0.000000 |
| 57 | 5 | 0 | 10.084715 | 0.000000   | 0.000000 |
| 58 | 5 | 0 | -5.041166 | 6.341328   | 0.000000 |
| 59 | 5 | 0 | 8.012334  | -1.195113  | 0.000000 |
| 60 | 5 | 0 | 5.042358  | -8.733620  | 0.000000 |
| 61 | 5 | 0 | 8.017075  | -13.885981 | 0.000000 |
| 62 | 8 | 0 | 5.707193  | -7.535776  | 0.000000 |
| 63 | 6 | 0 | 7.909742  | -11.306050 | 0.000000 |
| 64 | 6 | 0 | 7.231126  | -12.524677 | 0.000000 |
| 65 | 6 | 0 | 7.218164  | -10.107990 | 0.000000 |
| 66 | 6 | 0 | 5.823110  | -10.085922 | 0.000000 |
| 67 | 1 | 0 | 8.984595  | -11.300711 | 0.000000 |
| 68 | 1 | 0 | 7.761317  | -9.180144  | 0.000000 |
| 69 | 5 | 0 | 2.971169  | -7.536442  | 0.000000 |
| 70 | 8 | 0 | 3.672577  | -8.710462  | 0.000000 |
| 71 | 6 | 0 | 1.406826  | -7.536035  | 0.000000 |
| 72 | 6 | 0 | 0.691574  | -8.733937  | 0.000000 |
| 73 | 6 | 0 | -0.691574 | -8.733937  | 0.000000 |
| 74 | 6 | 0 | -1.406826 | -7.536035  | 0.000000 |
| 75 | 1 | 0 | 1.224475  | -9.667469  | 0.000000 |
| 76 | 5 | 0 | -2.971169 | -7.536442  | 0.000000 |
| 77 | 8 | 0 | -3.672577 | -8.710462  | 0.000000 |
| 78 | 1 | 0 | -1.224475 | -9.667469  | 0.000000 |
| 79 | 5 | 0 | 5.041166  | -6.341328  | 0.000000 |
| 80 | 8 | 0 | 3.672396  | -6.360777  | 0.000000 |
| 81 | 6 | 0 | 5.822985  | -4.986364  | 0.000000 |
| 82 | 6 | 0 | 5.143226  | -3.767977  | 0.000000 |
| 83 | 6 | 0 | 5.834777  | -2.570176  | 0.000000 |
| 84 | 6 | 0 | 7.229811  | -2.549671  | 0.000000 |
| 85 | 1 | 0 | 4.068300  | -3.762547  | 0.000000 |
| 86 | 1 | 0 | 5.292611  | -1.641978  | 0.000000 |
| 87 | 6 | 0 | 5.144694  | -11.305109 | 0.000000 |

|     |   |   |            |            |          |
|-----|---|---|------------|------------|----------|
| 88  | 6 | 0 | 5.836455   | -12.503063 | 0.000000 |
| 89  | 1 | 0 | 4.069579   | -11.311570 | 0.000000 |
| 90  | 1 | 0 | 5.294405   | -13.431243 | 0.000000 |
| 91  | 6 | 0 | 7.218025   | -4.965889  | 0.000000 |
| 92  | 6 | 0 | 7.909599   | -3.768048  | 0.000000 |
| 93  | 1 | 0 | 7.760036   | -5.894161  | 0.000000 |
| 94  | 8 | 0 | 9.379770   | -1.174686  | 0.000000 |
| 95  | 1 | 0 | 8.984512   | -3.773308  | 0.000000 |
| 96  | 6 | 0 | 0.691551   | -6.338153  | 0.000000 |
| 97  | 6 | 0 | -0.691551  | -6.338153  | 0.000000 |
| 98  | 1 | 0 | 1.224311   | -5.404525  | 0.000000 |
| 99  | 8 | 0 | -3.672396  | -6.360777  | 0.000000 |
| 100 | 1 | 0 | -1.224311  | -5.404525  | 0.000000 |
| 101 | 5 | 0 | -10.084715 | 0.000000   | 0.000000 |
| 102 | 5 | 0 | -16.034149 | 0.000000   | 0.000000 |
| 103 | 8 | 0 | -9.379770  | -1.174686  | 0.000000 |
| 104 | 6 | 0 | -13.746198 | -1.197013  | 0.000000 |
| 105 | 6 | 0 | -14.462252 | 0.000000   | 0.000000 |
| 106 | 6 | 0 | -12.362859 | -1.197118  | 0.000000 |
| 107 | 6 | 0 | -11.646220 | 0.000000   | 0.000000 |
| 108 | 1 | 0 | -14.279000 | -2.130532  | 0.000000 |
| 109 | 1 | 0 | -11.830896 | -2.131426  | 0.000000 |
| 110 | 5 | 0 | -8.012334  | 1.195113   | 0.000000 |
| 111 | 8 | 0 | -9.379770  | 1.174686   | 0.000000 |
| 112 | 6 | 0 | -7.229811  | 2.549671   | 0.000000 |
| 113 | 6 | 0 | -7.909599  | 3.768048   | 0.000000 |
| 114 | 6 | 0 | -7.218025  | 4.965889   | 0.000000 |
| 115 | 6 | 0 | -5.822985  | 4.986364   | 0.000000 |
| 116 | 1 | 0 | -8.984512  | 3.773308   | 0.000000 |
| 117 | 1 | 0 | -7.760036  | 5.894161   | 0.000000 |
| 118 | 5 | 0 | -8.012334  | -1.195113  | 0.000000 |
| 119 | 8 | 0 | -7.344793  | 0.000000   | 0.000000 |
| 120 | 6 | 0 | -7.229811  | -2.549671  | 0.000000 |
| 121 | 6 | 0 | -5.834777  | -2.570176  | 0.000000 |
| 122 | 6 | 0 | -5.143226  | -3.767977  | 0.000000 |
| 123 | 6 | 0 | -5.822985  | -4.986364  | 0.000000 |
| 124 | 1 | 0 | -5.292611  | -1.641978  | 0.000000 |
| 125 | 5 | 0 | -5.041166  | -6.341328  | 0.000000 |
| 126 | 1 | 0 | -4.068300  | -3.762547  | 0.000000 |
| 127 | 6 | 0 | -12.362859 | 1.197118   | 0.000000 |
| 128 | 6 | 0 | -13.746198 | 1.197013   | 0.000000 |
| 129 | 1 | 0 | -11.830896 | 2.131426   | 0.000000 |
| 130 | 1 | 0 | -14.279000 | 2.130532   | 0.000000 |
| 131 | 6 | 0 | -7.909599  | -3.768048  | 0.000000 |
| 132 | 6 | 0 | -7.218025  | -4.965889  | 0.000000 |
| 133 | 1 | 0 | -8.984512  | -3.773308  | 0.000000 |
| 134 | 8 | 0 | -5.707193  | -7.535776  | 0.000000 |
| 135 | 1 | 0 | -7.760036  | -5.894161  | 0.000000 |
| 136 | 6 | 0 | -5.834777  | 2.570176   | 0.000000 |
| 137 | 6 | 0 | -5.143226  | 3.767977   | 0.000000 |

|     |   |   |            |            |          |
|-----|---|---|------------|------------|----------|
| 138 | 1 | 0 | -5.292611  | 1.641978   | 0.000000 |
| 139 | 1 | 0 | -4.068300  | 3.762547   | 0.000000 |
| 140 | 5 | 0 | -5.042358  | -8.733620  | 0.000000 |
| 141 | 5 | 0 | -8.017075  | -13.885981 | 0.000000 |
| 142 | 6 | 0 | -7.231126  | -12.524677 | 0.000000 |
| 143 | 6 | 0 | -7.909742  | -11.306050 | 0.000000 |
| 144 | 6 | 0 | -7.218164  | -10.107990 | 0.000000 |
| 145 | 6 | 0 | -5.823110  | -10.085922 | 0.000000 |
| 146 | 1 | 0 | -8.984595  | -11.300711 | 0.000000 |
| 147 | 1 | 0 | -7.761317  | -9.180144  | 0.000000 |
| 148 | 6 | 0 | -5.836455  | -12.503063 | 0.000000 |
| 149 | 6 | 0 | -5.144694  | -11.305109 | 0.000000 |
| 150 | 1 | 0 | -5.294405  | -13.431243 | 0.000000 |
| 151 | 1 | 0 | -4.069579  | -11.311570 | 0.000000 |
| 152 | 5 | 0 | 16.034149  | 0.000000   | 0.000000 |
| 153 | 6 | 0 | 14.462252  | 0.000000   | 0.000000 |
| 154 | 6 | 0 | 13.746198  | -1.197013  | 0.000000 |
| 155 | 6 | 0 | 12.362859  | -1.197118  | 0.000000 |
| 156 | 6 | 0 | 11.646220  | 0.000000   | 0.000000 |
| 157 | 1 | 0 | 14.279000  | -2.130532  | 0.000000 |
| 158 | 1 | 0 | 11.830896  | -2.131426  | 0.000000 |
| 159 | 6 | 0 | 13.746198  | 1.197013   | 0.000000 |
| 160 | 6 | 0 | 12.362859  | 1.197118   | 0.000000 |
| 161 | 1 | 0 | 14.279000  | 2.130532   | 0.000000 |
| 162 | 1 | 0 | 11.830896  | 2.131426   | 0.000000 |
| 163 | 8 | 0 | 9.378312   | -13.850300 | 0.000000 |
| 164 | 1 | 0 | 9.822000   | -14.685439 | 0.000000 |
| 165 | 8 | 0 | 7.305556   | -15.047007 | 0.000000 |
| 166 | 1 | 0 | 7.806963   | -15.848821 | 0.000000 |
| 167 | 8 | 0 | -7.305556  | -15.047007 | 0.000000 |
| 168 | 1 | 0 | -7.806963  | -15.848821 | 0.000000 |
| 169 | 8 | 0 | -9.378312  | -13.850300 | 0.000000 |
| 170 | 1 | 0 | -9.822000  | -14.685439 | 0.000000 |
| 171 | 8 | 0 | -16.683868 | -1.196706  | 0.000000 |
| 172 | 1 | 0 | -17.628963 | -1.163382  | 0.000000 |
| 173 | 8 | 0 | -16.683868 | 1.196706   | 0.000000 |
| 174 | 1 | 0 | -17.628963 | 1.163382   | 0.000000 |
| 175 | 8 | 0 | -9.378312  | 13.850300  | 0.000000 |
| 176 | 1 | 0 | -9.822000  | 14.685439  | 0.000000 |
| 177 | 8 | 0 | -7.305556  | 15.047007  | 0.000000 |
| 178 | 1 | 0 | -7.806963  | 15.848821  | 0.000000 |
| 179 | 8 | 0 | 7.305556   | 15.047007  | 0.000000 |
| 180 | 1 | 0 | 7.806963   | 15.848821  | 0.000000 |
| 181 | 8 | 0 | 9.378312   | 13.850300  | 0.000000 |
| 182 | 1 | 0 | 9.822000   | 14.685439  | 0.000000 |
| 183 | 8 | 0 | 16.683868  | 1.196706   | 0.000000 |
| 184 | 1 | 0 | 17.628963  | 1.163382   | 0.000000 |
| 185 | 8 | 0 | 16.683868  | -1.196706  | 0.000000 |
| 186 | 1 | 0 | 17.628963  | -1.163382  | 0.000000 |

# CTF-1

$$E_0 = E_{elec} + ZPE = -4969.104956$$

$$H = E + RT = -4969.01747$$

| Center<br>Number | Atomic<br>Number | Atomic<br>Type | Coordinates (Angstroms) |            |          |
|------------------|------------------|----------------|-------------------------|------------|----------|
|                  |                  |                | X                       | Y          | Z        |
| 1                | 6                | 0              | 7.647824                | 3.618151   | 0.000000 |
| 2                | 6                | 0              | 6.960545                | 2.408707   | 0.000000 |
| 3                | 6                | 0              | 6.957322                | 4.814135   | 0.000000 |
| 4                | 6                | 0              | 5.566274                | 4.823655   | 0.000000 |
| 5                | 1                | 0              | 8.719340                | 3.617569   | 0.000000 |
| 6                | 1                | 0              | 7.492577                | 5.742385   | 0.000000 |
| 7                | 6                | 0              | 1.394271                | 7.232362   | 0.000000 |
| 8                | 6                | 0              | 0.690510                | 6.032330   | 0.000000 |
| 9                | 6                | 0              | -0.690510               | 6.032330   | 0.000000 |
| 10               | 6                | 0              | -1.394271               | 7.232362   | 0.000000 |
| 11               | 1                | 0              | 1.227354                | 5.104957   | 0.000000 |
| 12               | 1                | 0              | -1.227354               | 5.104957   | 0.000000 |
| 13               | 6                | 0              | 5.565843                | 9.640322   | 0.000000 |
| 14               | 6                | 0              | 4.875068                | 10.848149  | 0.000000 |
| 15               | 6                | 0              | 5.562510                | 12.045973  | 0.000000 |
| 16               | 6                | 0              | 6.952111                | 12.041409  | 0.000000 |
| 17               | 1                | 0              | 3.803790                | 10.844194  | 0.000000 |
| 18               | 1                | 0              | 5.029959                | 12.978307  | 0.000000 |
| 19               | 6                | 0              | 4.878896                | 3.614164   | 0.000000 |
| 20               | 6                | 0              | 5.569405                | 2.418166   | 0.000000 |
| 21               | 1                | 0              | 3.807345                | 3.615399   | 0.000000 |
| 22               | 1                | 0              | 5.034700                | 1.489559   | 0.000000 |
| 23               | 6                | 0              | 6.957238                | 9.646007   | 0.000000 |
| 24               | 6                | 0              | 7.650864                | 10.840262  | 0.000000 |
| 25               | 1                | 0              | 7.489452                | 8.716276   | 0.000000 |
| 26               | 1                | 0              | 8.724564                | 10.845225  | 0.000000 |
| 27               | 6                | 0              | 0.690502                | 8.432285   | 0.000000 |
| 28               | 6                | 0              | -0.690502               | 8.432285   | 0.000000 |
| 29               | 1                | 0              | 1.226763                | 9.359955   | 0.000000 |
| 30               | 1                | 0              | -1.226763               | 9.359955   | 0.000000 |
| 31               | 6                | 0              | -6.952111               | 12.041409  | 0.000000 |
| 32               | 6                | 0              | -5.562510               | 12.045973  | 0.000000 |
| 33               | 6                | 0              | -4.875068               | 10.848149  | 0.000000 |
| 34               | 6                | 0              | -5.565843               | 9.640322   | 0.000000 |
| 35               | 1                | 0              | -5.029959               | 12.978307  | 0.000000 |
| 36               | 1                | 0              | -3.803790               | 10.844194  | 0.000000 |
| 37               | 6                | 0              | -7.650864               | 10.840262  | 0.000000 |
| 38               | 6                | 0              | -6.957238               | 9.646007   | 0.000000 |
| 39               | 1                | 0              | -8.724564               | 10.845225  | 0.000000 |
| 40               | 1                | 0              | -7.489452               | 8.716276   | 0.000000 |
| 41               | 6                | 0              | 7.650864                | -10.840262 | 0.000000 |

|    |   |   |            |            |          |
|----|---|---|------------|------------|----------|
| 42 | 6 | 0 | 6.952111   | -12.041409 | 0.000000 |
| 43 | 6 | 0 | 6.957238   | -9.646007  | 0.000000 |
| 44 | 6 | 0 | 5.565843   | -9.640322  | 0.000000 |
| 45 | 1 | 0 | 8.724564   | -10.845225 | 0.000000 |
| 46 | 1 | 0 | 7.489452   | -8.716276  | 0.000000 |
| 47 | 6 | 0 | 1.394271   | -7.232362  | 0.000000 |
| 48 | 6 | 0 | 0.690502   | -8.432285  | 0.000000 |
| 49 | 6 | 0 | -0.690502  | -8.432285  | 0.000000 |
| 50 | 6 | 0 | -1.394271  | -7.232362  | 0.000000 |
| 51 | 1 | 0 | 1.226763   | -9.359955  | 0.000000 |
| 52 | 1 | 0 | -1.226763  | -9.359955  | 0.000000 |
| 53 | 6 | 0 | 5.566274   | -4.823655  | 0.000000 |
| 54 | 6 | 0 | 4.878896   | -3.614164  | 0.000000 |
| 55 | 6 | 0 | 5.569405   | -2.418166  | 0.000000 |
| 56 | 6 | 0 | 6.960545   | -2.408707  | 0.000000 |
| 57 | 1 | 0 | 3.807345   | -3.615399  | 0.000000 |
| 58 | 1 | 0 | 5.034700   | -1.489559  | 0.000000 |
| 59 | 6 | 0 | 4.875068   | -10.848149 | 0.000000 |
| 60 | 6 | 0 | 5.562510   | -12.045973 | 0.000000 |
| 61 | 1 | 0 | 3.803790   | -10.844194 | 0.000000 |
| 62 | 1 | 0 | 5.029959   | -12.978307 | 0.000000 |
| 63 | 6 | 0 | 6.957322   | -4.814135  | 0.000000 |
| 64 | 6 | 0 | 7.647824   | -3.618151  | 0.000000 |
| 65 | 1 | 0 | 7.492577   | -5.742385  | 0.000000 |
| 66 | 1 | 0 | 8.719340   | -3.617569  | 0.000000 |
| 67 | 6 | 0 | 0.690510   | -6.032330  | 0.000000 |
| 68 | 6 | 0 | -0.690510  | -6.032330  | 0.000000 |
| 69 | 1 | 0 | 1.227354   | -5.104957  | 0.000000 |
| 70 | 1 | 0 | -1.227354  | -5.104957  | 0.000000 |
| 71 | 6 | 0 | -13.213374 | -1.205712  | 0.000000 |
| 72 | 6 | 0 | -13.904221 | 0.000000   | 0.000000 |
| 73 | 6 | 0 | -11.832306 | -1.202141  | 0.000000 |
| 74 | 6 | 0 | -11.131685 | 0.000000   | 0.000000 |
| 75 | 1 | 0 | -13.754523 | -2.133081  | 0.000000 |
| 76 | 1 | 0 | -11.293242 | -2.127918  | 0.000000 |
| 77 | 6 | 0 | -6.960545  | 2.408707   | 0.000000 |
| 78 | 6 | 0 | -7.647824  | 3.618151   | 0.000000 |
| 79 | 6 | 0 | -6.957322  | 4.814135   | 0.000000 |
| 80 | 6 | 0 | -5.566274  | 4.823655   | 0.000000 |
| 81 | 1 | 0 | -8.719340  | 3.617569   | 0.000000 |
| 82 | 1 | 0 | -7.492577  | 5.742385   | 0.000000 |
| 83 | 6 | 0 | -6.960545  | -2.408707  | 0.000000 |
| 84 | 6 | 0 | -5.569405  | -2.418166  | 0.000000 |
| 85 | 6 | 0 | -4.878896  | -3.614164  | 0.000000 |
| 86 | 6 | 0 | -5.566274  | -4.823655  | 0.000000 |
| 87 | 1 | 0 | -5.034700  | -1.489559  | 0.000000 |
| 88 | 1 | 0 | -3.807345  | -3.615399  | 0.000000 |
| 89 | 6 | 0 | -11.832306 | 1.202141   | 0.000000 |
| 90 | 6 | 0 | -13.213374 | 1.205712   | 0.000000 |
| 91 | 1 | 0 | -11.293242 | 2.127918   | 0.000000 |

|     |   |   |            |            |          |
|-----|---|---|------------|------------|----------|
| 92  | 1 | 0 | -13.754523 | 2.133081   | 0.000000 |
| 93  | 6 | 0 | -7.647824  | -3.618151  | 0.000000 |
| 94  | 6 | 0 | -6.957322  | -4.814135  | 0.000000 |
| 95  | 1 | 0 | -8.719340  | -3.617569  | 0.000000 |
| 96  | 1 | 0 | -7.492577  | -5.742385  | 0.000000 |
| 97  | 6 | 0 | -5.569405  | 2.418166   | 0.000000 |
| 98  | 6 | 0 | -4.878896  | 3.614164   | 0.000000 |
| 99  | 1 | 0 | -5.034700  | 1.489559   | 0.000000 |
| 100 | 1 | 0 | -3.807345  | 3.615399   | 0.000000 |
| 101 | 6 | 0 | -6.952111  | -12.041409 | 0.000000 |
| 102 | 6 | 0 | -7.650864  | -10.840262 | 0.000000 |
| 103 | 6 | 0 | -6.957238  | -9.646007  | 0.000000 |
| 104 | 6 | 0 | -5.565843  | -9.640322  | 0.000000 |
| 105 | 1 | 0 | -8.724564  | -10.845225 | 0.000000 |
| 106 | 1 | 0 | -7.489452  | -8.716276  | 0.000000 |
| 107 | 6 | 0 | -5.562510  | -12.045973 | 0.000000 |
| 108 | 6 | 0 | -4.875068  | -10.848149 | 0.000000 |
| 109 | 1 | 0 | -5.029959  | -12.978307 | 0.000000 |
| 110 | 1 | 0 | -3.803790  | -10.844194 | 0.000000 |
| 111 | 6 | 0 | 13.904221  | 0.000000   | 0.000000 |
| 112 | 6 | 0 | 13.213374  | -1.205712  | 0.000000 |
| 113 | 6 | 0 | 11.832306  | -1.202141  | 0.000000 |
| 114 | 6 | 0 | 11.131685  | 0.000000   | 0.000000 |
| 115 | 1 | 0 | 13.754523  | -2.133081  | 0.000000 |
| 116 | 1 | 0 | 11.293242  | -2.127918  | 0.000000 |
| 117 | 6 | 0 | 13.213374  | 1.205712   | 0.000000 |
| 118 | 6 | 0 | 11.832306  | 1.202141   | 0.000000 |
| 119 | 1 | 0 | 13.754523  | 2.133081   | 0.000000 |
| 120 | 1 | 0 | 11.293242  | 2.127918   | 0.000000 |
| 121 | 6 | 0 | 4.821473   | -8.351036  | 0.000000 |
| 122 | 6 | 0 | 4.822771   | -6.111350  | 0.000000 |
| 123 | 6 | 0 | 2.881199   | -7.232317  | 0.000000 |
| 124 | 6 | 0 | -4.821473  | -8.351036  | 0.000000 |
| 125 | 6 | 0 | -2.881199  | -7.232317  | 0.000000 |
| 126 | 6 | 0 | -4.822771  | -6.111350  | 0.000000 |
| 127 | 6 | 0 | 7.703970   | -1.120967  | 0.000000 |
| 128 | 6 | 0 | 9.642946   | 0.000000   | 0.000000 |
| 129 | 6 | 0 | 7.703970   | 1.120967   | 0.000000 |
| 130 | 6 | 0 | 4.822771   | 6.111350   | 0.000000 |
| 131 | 6 | 0 | 4.821473   | 8.351036   | 0.000000 |
| 132 | 6 | 0 | 2.881199   | 7.232317   | 0.000000 |
| 133 | 6 | 0 | -2.881199  | 7.232317   | 0.000000 |
| 134 | 6 | 0 | -4.821473  | 8.351036   | 0.000000 |
| 135 | 6 | 0 | -4.822771  | 6.111350   | 0.000000 |
| 136 | 6 | 0 | -7.703970  | 1.120967   | 0.000000 |
| 137 | 6 | 0 | -7.703970  | -1.120967  | 0.000000 |
| 138 | 6 | 0 | -9.642946  | 0.000000   | 0.000000 |
| 139 | 7 | 0 | -3.502130  | -8.399558  | 0.000000 |
| 140 | 7 | 0 | -5.523166  | -7.232713  | 0.000000 |
| 141 | 7 | 0 | -3.502328  | -6.066211  | 0.000000 |



|     |   |   |            |            |          |
|-----|---|---|------------|------------|----------|
| 142 | 7 | 0 | 3.502130   | -8.399558  | 0.000000 |
| 143 | 7 | 0 | 5.523166   | -7.232713  | 0.000000 |
| 144 | 7 | 0 | 3.502328   | -6.066211  | 0.000000 |
| 145 | 7 | 0 | 9.025296   | -1.166846  | 0.000000 |
| 146 | 7 | 0 | 9.025296   | 1.166846   | 0.000000 |
| 147 | 7 | 0 | 7.004657   | 0.000000   | 0.000000 |
| 148 | 7 | 0 | 5.523166   | 7.232713   | 0.000000 |
| 149 | 7 | 0 | 3.502328   | 6.066211   | 0.000000 |
| 150 | 7 | 0 | 3.502130   | 8.399558   | 0.000000 |
| 151 | 7 | 0 | -3.502328  | 6.066211   | 0.000000 |
| 152 | 7 | 0 | -3.502130  | 8.399558   | 0.000000 |
| 153 | 7 | 0 | -5.523166  | 7.232713   | 0.000000 |
| 154 | 7 | 0 | -7.004657  | 0.000000   | 0.000000 |
| 155 | 7 | 0 | -9.025296  | -1.166846  | 0.000000 |
| 156 | 7 | 0 | -9.025296  | 1.166846   | 0.000000 |
| 157 | 6 | 0 | 7.674807   | -13.293155 | 0.000000 |
| 158 | 7 | 0 | 8.242850   | -14.277035 | 0.000000 |
| 159 | 6 | 0 | 15.349613  | 0.000000   | 0.000000 |
| 160 | 7 | 0 | 16.485700  | 0.000000   | 0.000000 |
| 161 | 6 | 0 | 7.674807   | 13.293155  | 0.000000 |
| 162 | 7 | 0 | 8.242850   | 14.277035  | 0.000000 |
| 163 | 6 | 0 | -7.674807  | 13.293155  | 0.000000 |
| 164 | 7 | 0 | -8.242850  | 14.277035  | 0.000000 |
| 165 | 6 | 0 | -15.349613 | 0.000000   | 0.000000 |
| 166 | 7 | 0 | -16.485700 | 0.000000   | 0.000000 |
| 167 | 6 | 0 | -7.674807  | -13.293155 | 0.000000 |
| 168 | 7 | 0 | -8.242850  | -14.277035 | 0.000000 |

-----

# TPG

$$E_0 = E_{elec} + ZPE = -4130.252253$$

$$H = E + RT = -4130.187133$$

| Center<br>Number | Atomic<br>Number | Atomic<br>Type | Coordinates (Angstroms) |            |          |
|------------------|------------------|----------------|-------------------------|------------|----------|
|                  |                  |                | X                       | Y          | Z        |
| 1                | 6                | 0              | 7.877435                | 3.750554   | 0.000000 |
| 2                | 6                | 0              | 7.228035                | 2.517357   | 0.000000 |
| 3                | 6                | 0              | 7.186792                | 4.946782   | 0.000000 |
| 4                | 6                | 0              | 5.794113                | 5.000984   | 0.000000 |
| 5                | 1                | 0              | 8.947591                | 3.808568   | 0.000000 |
| 6                | 1                | 0              | 7.772112                | 5.844557   | 0.000000 |
| 7                | 6                | 0              | 1.433922                | 7.518341   | 0.000000 |
| 8                | 6                | 0              | 0.690597                | 6.339367   | 0.000000 |
| 9                | 6                | 0              | -0.690597               | 6.339367   | 0.000000 |
| 10               | 6                | 0              | -1.433922               | 7.518341   | 0.000000 |
| 11               | 1                | 0              | 1.175521                | 5.383610   | 0.000000 |
| 12               | 1                | 0              | -1.175521               | 5.383610   | 0.000000 |
| 13               | 6                | 0              | 5.796430                | 10.039711  | 0.000000 |
| 14               | 6                | 0              | 5.133866                | 11.268822  | 0.000000 |
| 15               | 6                | 0              | 5.823921                | 12.468244  | 0.000000 |
| 16               | 1                | 0              | 4.063301                | 11.315090  | 0.000000 |
| 17               | 1                | 0              | 5.273255                | 13.392062  | 0.000000 |
| 18               | 6                | 0              | 5.144754                | 3.767758   | 0.000000 |
| 19               | 6                | 0              | 5.835351                | 2.571609   | 0.000000 |
| 20               | 1                | 0              | 4.074582                | 3.709836   | 0.000000 |
| 21               | 1                | 0              | 5.250103                | 1.673774   | 0.000000 |
| 22               | 6                | 0              | 7.192153                | 10.080470  | 0.000000 |
| 23               | 6                | 0              | 7.885855                | 11.277786  | 0.000000 |
| 24               | 1                | 0              | 7.767505                | 9.176467   | 0.000000 |
| 25               | 1                | 0              | 8.961239                | 11.262804  | 0.000000 |
| 26               | 6                | 0              | 0.690642                | 8.697335   | 0.000000 |
| 27               | 6                | 0              | -0.690642               | 8.697335   | 0.000000 |
| 28               | 1                | 0              | 1.175479                | 9.653125   | 0.000000 |
| 29               | 1                | 0              | -1.175479               | 9.653125   | 0.000000 |
| 30               | 6                | 0              | -5.823921               | 12.468244  | 0.000000 |
| 31               | 6                | 0              | -5.133866               | 11.268822  | 0.000000 |
| 32               | 6                | 0              | -5.796430               | 10.039711  | 0.000000 |
| 33               | 1                | 0              | -5.273255               | 13.392062  | 0.000000 |
| 34               | 1                | 0              | -4.063301               | 11.315090  | 0.000000 |
| 35               | 6                | 0              | -7.885855               | 11.277786  | 0.000000 |
| 36               | 6                | 0              | -7.192153               | 10.080470  | 0.000000 |
| 37               | 1                | 0              | -8.961239               | 11.262804  | 0.000000 |
| 38               | 1                | 0              | -7.767505               | 9.176467   | 0.000000 |
| 39               | 6                | 0              | 7.885855                | -11.277786 | 0.000000 |
| 40               | 6                | 0              | 7.192153                | -10.080470 | 0.000000 |
| 41               | 6                | 0              | 5.796430                | -10.039711 | 0.000000 |

|    |   |   |            |            |          |
|----|---|---|------------|------------|----------|
| 42 | 1 | 0 | 8.961239   | -11.262804 | 0.000000 |
| 43 | 1 | 0 | 7.767505   | -9.176467  | 0.000000 |
| 44 | 6 | 0 | 1.433922   | -7.518341  | 0.000000 |
| 45 | 6 | 0 | 0.690642   | -8.697335  | 0.000000 |
| 46 | 6 | 0 | -0.690642  | -8.697335  | 0.000000 |
| 47 | 6 | 0 | -1.433922  | -7.518341  | 0.000000 |
| 48 | 1 | 0 | 1.175479   | -9.653125  | 0.000000 |
| 49 | 1 | 0 | -1.175479  | -9.653125  | 0.000000 |
| 50 | 6 | 0 | 5.794113   | -5.000984  | 0.000000 |
| 51 | 6 | 0 | 5.144754   | -3.767758  | 0.000000 |
| 52 | 6 | 0 | 5.835351   | -2.571609  | 0.000000 |
| 53 | 6 | 0 | 7.228035   | -2.517357  | 0.000000 |
| 54 | 1 | 0 | 4.074582   | -3.709836  | 0.000000 |
| 55 | 1 | 0 | 5.250103   | -1.673774  | 0.000000 |
| 56 | 6 | 0 | 5.133866   | -11.268822 | 0.000000 |
| 57 | 6 | 0 | 5.823921   | -12.468244 | 0.000000 |
| 58 | 1 | 0 | 4.063301   | -11.315090 | 0.000000 |
| 59 | 1 | 0 | 5.273255   | -13.392062 | 0.000000 |
| 60 | 6 | 0 | 7.186792   | -4.946782  | 0.000000 |
| 61 | 6 | 0 | 7.877435   | -3.750554  | 0.000000 |
| 62 | 1 | 0 | 7.772112   | -5.844557  | 0.000000 |
| 63 | 1 | 0 | 8.947591   | -3.808568  | 0.000000 |
| 64 | 6 | 0 | 0.690597   | -6.339367  | 0.000000 |
| 65 | 6 | 0 | -0.690597  | -6.339367  | 0.000000 |
| 66 | 1 | 0 | 1.175521   | -5.383610  | 0.000000 |
| 67 | 1 | 0 | -1.175521  | -5.383610  | 0.000000 |
| 68 | 6 | 0 | -13.709776 | -1.190458  | 0.000000 |
| 69 | 6 | 0 | -12.326019 | -1.188353  | 0.000000 |
| 70 | 6 | 0 | -11.592859 | 0.000000   | 0.000000 |
| 71 | 1 | 0 | -14.234494 | -2.129258  | 0.000000 |
| 72 | 1 | 0 | -11.830806 | -2.138623  | 0.000000 |
| 73 | 6 | 0 | -7.228035  | 2.517357   | 0.000000 |
| 74 | 6 | 0 | -7.877435  | 3.750554   | 0.000000 |
| 75 | 6 | 0 | -7.186792  | 4.946782   | 0.000000 |
| 76 | 6 | 0 | -5.794113  | 5.000984   | 0.000000 |
| 77 | 1 | 0 | -8.947591  | 3.808568   | 0.000000 |
| 78 | 1 | 0 | -7.772112  | 5.844557   | 0.000000 |
| 79 | 6 | 0 | -7.228035  | -2.517357  | 0.000000 |
| 80 | 6 | 0 | -5.835351  | -2.571609  | 0.000000 |
| 81 | 6 | 0 | -5.144754  | -3.767758  | 0.000000 |
| 82 | 6 | 0 | -5.794113  | -5.000984  | 0.000000 |
| 83 | 1 | 0 | -5.250103  | -1.673774  | 0.000000 |
| 84 | 1 | 0 | -4.074582  | -3.709836  | 0.000000 |
| 85 | 6 | 0 | -12.326019 | 1.188353   | 0.000000 |
| 86 | 6 | 0 | -13.709776 | 1.190458   | 0.000000 |
| 87 | 1 | 0 | -11.830806 | 2.138623   | 0.000000 |
| 88 | 1 | 0 | -14.234494 | 2.129258   | 0.000000 |
| 89 | 6 | 0 | -7.877435  | -3.750554  | 0.000000 |
| 90 | 6 | 0 | -7.186792  | -4.946782  | 0.000000 |
| 91 | 1 | 0 | -8.947591  | -3.808568  | 0.000000 |

|     |   |   |            |            |          |
|-----|---|---|------------|------------|----------|
| 92  | 1 | 0 | -7.772112  | -5.844557  | 0.000000 |
| 93  | 6 | 0 | -5.835351  | 2.571609   | 0.000000 |
| 94  | 6 | 0 | -5.144754  | 3.767758   | 0.000000 |
| 95  | 1 | 0 | -5.250103  | 1.673774   | 0.000000 |
| 96  | 1 | 0 | -4.074582  | 3.709836   | 0.000000 |
| 97  | 6 | 0 | -7.885855  | -11.277786 | 0.000000 |
| 98  | 6 | 0 | -7.192153  | -10.080470 | 0.000000 |
| 99  | 6 | 0 | -5.796430  | -10.039711 | 0.000000 |
| 100 | 1 | 0 | -8.961239  | -11.262804 | 0.000000 |
| 101 | 1 | 0 | -7.767505  | -9.176467  | 0.000000 |
| 102 | 6 | 0 | -5.823921  | -12.468244 | 0.000000 |
| 103 | 6 | 0 | -5.133866  | -11.268822 | 0.000000 |
| 104 | 1 | 0 | -5.273255  | -13.392062 | 0.000000 |
| 105 | 1 | 0 | -4.063301  | -11.315090 | 0.000000 |
| 106 | 6 | 0 | 13.709776  | -1.190458  | 0.000000 |
| 107 | 6 | 0 | 12.326019  | -1.188353  | 0.000000 |
| 108 | 6 | 0 | 11.592859  | 0.000000   | 0.000000 |
| 109 | 1 | 0 | 14.234494  | -2.129258  | 0.000000 |
| 110 | 1 | 0 | 11.830806  | -2.138623  | 0.000000 |
| 111 | 6 | 0 | 13.709776  | 1.190458   | 0.000000 |
| 112 | 6 | 0 | 12.326019  | 1.188353   | 0.000000 |
| 113 | 1 | 0 | 14.234494  | 2.129258   | 0.000000 |
| 114 | 1 | 0 | 11.830806  | 2.138623   | 0.000000 |
| 115 | 6 | 0 | 5.044530   | -8.737382  | 0.000000 |
| 116 | 6 | 0 | 5.043442   | -6.300351  | 0.000000 |
| 117 | 6 | 0 | 2.934543   | -7.517925  | 0.000000 |
| 118 | 6 | 0 | -5.044530  | -8.737382  | 0.000000 |
| 119 | 6 | 0 | -2.934543  | -7.517925  | 0.000000 |
| 120 | 6 | 0 | -5.043442  | -6.300351  | 0.000000 |
| 121 | 6 | 0 | 7.977985   | -1.217574  | 0.000000 |
| 122 | 6 | 0 | 10.089060  | 0.000000   | 0.000000 |
| 123 | 6 | 0 | 7.977985   | 1.217574   | 0.000000 |
| 124 | 6 | 0 | 5.043442   | 6.300351   | 0.000000 |
| 125 | 6 | 0 | 5.044530   | 8.737382   | 0.000000 |
| 126 | 6 | 0 | 2.934543   | 7.517925   | 0.000000 |
| 127 | 6 | 0 | -2.934543  | 7.517925   | 0.000000 |
| 128 | 6 | 0 | -5.044530  | 8.737382   | 0.000000 |
| 129 | 6 | 0 | -5.043442  | 6.300351   | 0.000000 |
| 130 | 6 | 0 | -7.977985  | 1.217574   | 0.000000 |
| 131 | 6 | 0 | -7.977985  | -1.217574  | 0.000000 |
| 132 | 6 | 0 | -10.089060 | 0.000000   | 0.000000 |
| 133 | 6 | 0 | 14.414475  | 0.000000   | 0.000000 |
| 134 | 1 | 0 | 15.489566  | 0.000000   | 0.000000 |
| 135 | 6 | 0 | 7.207237   | 12.483301  | 0.000000 |
| 136 | 1 | 0 | 7.744783   | 13.414358  | 0.000000 |
| 137 | 6 | 0 | -7.207237  | 12.483301  | 0.000000 |
| 138 | 1 | 0 | -7.744783  | 13.414358  | 0.000000 |
| 139 | 6 | 0 | -14.414475 | 0.000000   | 0.000000 |
| 140 | 1 | 0 | -15.489566 | 0.000000   | 0.000000 |
| 141 | 6 | 0 | -7.207237  | -12.483301 | 0.000000 |

|     |   |   |           |            |          |
|-----|---|---|-----------|------------|----------|
| 142 | 1 | 0 | -7.744783 | -13.414358 | 0.000000 |
| 143 | 6 | 0 | 7.207237  | -12.483301 | 0.000000 |
| 144 | 1 | 0 | 7.744783  | -13.414358 | 0.000000 |
| 145 | 6 | 0 | 9.368862  | -1.190165  | 0.000000 |
| 146 | 1 | 0 | 9.900760  | -2.114595  | 0.000000 |
| 147 | 6 | 0 | 9.368862  | 1.190165   | 0.000000 |
| 148 | 1 | 0 | 9.900760  | 2.114595   | 0.000000 |
| 149 | 6 | 0 | 7.305711  | 0.000000   | 0.000000 |
| 150 | 1 | 0 | 6.238954  | 0.000000   | 0.000000 |
| 151 | 6 | 0 | 5.715144  | 7.518589   | 0.000000 |
| 152 | 1 | 0 | 6.781673  | 7.517012   | 0.000000 |
| 153 | 6 | 0 | 3.653717  | 8.708755   | 0.000000 |
| 154 | 1 | 0 | 3.119087  | 9.631607   | 0.000000 |
| 155 | 6 | 0 | 3.652856  | 6.326931   | 0.000000 |
| 156 | 1 | 0 | 3.119477  | 5.403092   | 0.000000 |
| 157 | 6 | 0 | -3.653717 | 8.708755   | 0.000000 |
| 158 | 1 | 0 | -3.119087 | 9.631607   | 0.000000 |
| 159 | 6 | 0 | -3.652856 | 6.326931   | 0.000000 |
| 160 | 1 | 0 | -3.119477 | 5.403092   | 0.000000 |
| 161 | 6 | 0 | -5.715144 | 7.518589   | 0.000000 |
| 162 | 1 | 0 | -6.781673 | 7.517012   | 0.000000 |
| 163 | 6 | 0 | -7.305711 | 0.000000   | 0.000000 |
| 164 | 1 | 0 | -6.238954 | 0.000000   | 0.000000 |
| 165 | 6 | 0 | -9.368862 | 1.190165   | 0.000000 |
| 166 | 1 | 0 | -9.900760 | 2.114595   | 0.000000 |
| 167 | 6 | 0 | -9.368862 | -1.190165  | 0.000000 |
| 168 | 1 | 0 | -9.900760 | -2.114595  | 0.000000 |
| 169 | 6 | 0 | -3.652856 | -6.326931  | 0.000000 |
| 170 | 1 | 0 | -3.119477 | -5.403092  | 0.000000 |
| 171 | 6 | 0 | -5.715144 | -7.518589  | 0.000000 |
| 172 | 1 | 0 | -6.781673 | -7.517012  | 0.000000 |
| 173 | 6 | 0 | -3.653717 | -8.708755  | 0.000000 |
| 174 | 1 | 0 | -3.119087 | -9.631607  | 0.000000 |
| 175 | 6 | 0 | 3.653717  | -8.708755  | 0.000000 |
| 176 | 1 | 0 | 3.119087  | -9.631607  | 0.000000 |
| 177 | 6 | 0 | 5.715144  | -7.518589  | 0.000000 |
| 178 | 1 | 0 | 6.781673  | -7.517012  | 0.000000 |
| 179 | 6 | 0 | 3.652856  | -6.326931  | 0.000000 |
| 180 | 1 | 0 | 3.119477  | -5.403092  | 0.000000 |

-----

### Benzene

$$E_0 = E_{elec} + ZPE = -230.595463$$

$$H = E + RT = -230.590423$$

| Center<br>Number | Atomic<br>Number | Atomic<br>Type | Coordinates (Angstroms) |           |          |
|------------------|------------------|----------------|-------------------------|-----------|----------|
|                  |                  |                | X                       | Y         | Z        |
| 1                | 6                | 0              | 0.000000                | 1.386175  | 0.000000 |
| 2                | 6                | 0              | 1.200463                | 0.693087  | 0.000000 |
| 3                | 1                | 0              | 0.000000                | 2.461761  | 0.000000 |
| 4                | 1                | 0              | 2.131948                | 1.230881  | 0.000000 |
| 5                | 6                | 0              | -1.200463               | -0.693087 | 0.000000 |
| 6                | 6                | 0              | 0.000000                | -1.386175 | 0.000000 |
| 7                | 1                | 0              | -2.131948               | -1.230881 | 0.000000 |
| 8                | 1                | 0              | 0.000000                | -2.461761 | 0.000000 |
| 9                | 6                | 0              | -1.200463               | 0.693087  | 0.000000 |
| 10               | 1                | 0              | -2.131948               | 1.230881  | 0.000000 |
| 11               | 6                | 0              | 1.200463                | -0.693087 | 0.000000 |
| 12               | 1                | 0              | 2.131948                | -1.230881 | 0.000000 |

### 1,3,5,2,4,6-trioxatriborinane

$$E_0 = E_{elec} + ZPE = -300.642437$$

$$H = E + RT = -300.636644$$

| Center<br>Number | Atomic<br>Number | Atomic<br>Type | Coordinates (Angstroms) |           |          |
|------------------|------------------|----------------|-------------------------|-----------|----------|
|                  |                  |                | X                       | Y         | Z        |
| 1                | 8                | 0              | 0.000000                | 1.357069  | 0.000000 |
| 2                | 8                | 0              | -1.175256               | -0.678534 | 0.000000 |
| 3                | 8                | 0              | 1.175256                | -0.678534 | 0.000000 |
| 4                | 5                | 0              | 0.000000                | -1.370901 | 0.000000 |
| 5                | 1                | 0              | 0.000000                | -2.552688 | 0.000000 |
| 6                | 5                | 0              | -1.187235               | 0.685450  | 0.000000 |
| 7                | 1                | 0              | -2.210693               | 1.276344  | 0.000000 |
| 8                | 5                | 0              | 1.187235                | 0.685450  | 0.000000 |
| 9                | 1                | 0              | 2.210693                | 1.276344  | 0.000000 |

### Phenylboronic acid

$$E_0 = E_{elec} + ZPE = -405.68057$$

$$H = E + RT = -405.672141$$

| Center<br>Number | Atomic<br>Number | Atomic<br>Type | Coordinates (Angstroms) |           |           |
|------------------|------------------|----------------|-------------------------|-----------|-----------|
|                  |                  |                | X                       | Y         | Z         |
| 1                | 5                | 0              | 0.000000                | 0.000000  | -1.730972 |
| 2                | 6                | 0              | 0.000000                | 0.000000  | -0.163062 |
| 3                | 6                | 0              | 0.000000                | 1.196332  | 0.554668  |
| 4                | 6                | 0              | 0.000000                | 1.200556  | 1.939621  |
| 5                | 1                | 0              | 0.000000                | 2.129732  | 0.021291  |
| 6                | 1                | 0              | 0.000000                | 2.132702  | 2.476568  |
| 7                | 6                | 0              | 0.000000                | -1.196332 | 0.554668  |
| 8                | 6                | 0              | 0.000000                | -1.200556 | 1.939621  |
| 9                | 1                | 0              | 0.000000                | -2.129732 | 0.021291  |
| 10               | 1                | 0              | 0.000000                | -2.132702 | 2.476568  |
| 11               | 8                | 0              | 0.000000                | -1.196581 | -2.383831 |
| 12               | 1                | 0              | 0.000000                | -1.159844 | -3.328650 |
| 13               | 8                | 0              | 0.000000                | 1.196581  | -2.383831 |
| 14               | 1                | 0              | 0.000000                | 1.159844  | -3.328650 |
| 15               | 6                | 0              | 0.000000                | 0.000000  | 2.632642  |
| 16               | 1                | 0              | 0.000000                | 0.000000  | 3.708786  |

### 1,3,5-triazine

$$E_0 = E_{elec} + ZPE = -278.624669$$

$$H = E + RT = -278.61989$$

| Center<br>Number | Atomic<br>Number | Atomic<br>Type | Coordinates (Angstroms) |           |          |
|------------------|------------------|----------------|-------------------------|-----------|----------|
|                  |                  |                | X                       | Y         | Z        |
| 1                | 7                | 0              | 1.172416                | 0.676895  | 0.000000 |
| 2                | 7                | 0              | -1.172416               | 0.676895  | 0.000000 |
| 3                | 7                | 0              | 0.000000                | -1.353790 | 0.000000 |
| 4                | 6                | 0              | 0.000000                | 1.279206  | 0.000000 |
| 5                | 1                | 0              | 0.000000                | 2.354192  | 0.000000 |
| 6                | 6                | 0              | -1.107825               | -0.639603 | 0.000000 |
| 7                | 1                | 0              | -2.038790               | -1.177096 | 0.000000 |
| 8                | 6                | 0              | 1.107825                | -0.639603 | 0.000000 |
| 9                | 1                | 0              | 2.038790                | -1.177096 | 0.000000 |

### Benzonitrile

$$E_0 = E_{elec} + ZPE = -322.332137$$

$$H = E + RT = -322.325493$$

| Center<br>Number | Atomic<br>Number | Atomic<br>Type | Coordinates (Angstroms) |           |           |
|------------------|------------------|----------------|-------------------------|-----------|-----------|
|                  |                  |                | X                       | Y         | Z         |
| 1                | 6                | 0              | 0.000000                | 0.000000  | 0.599164  |
| 2                | 6                | 0              | 0.000000                | 1.207009  | -0.091172 |
| 3                | 6                | 0              | 0.000000                | 1.202594  | -1.474285 |
| 4                | 1                | 0              | 0.000000                | 2.133027  | 0.453002  |
| 5                | 1                | 0              | 0.000000                | 2.133349  | -2.011221 |
| 6                | 6                | 0              | 0.000000                | -1.207009 | -0.091172 |
| 7                | 6                | 0              | 0.000000                | -1.202594 | -1.474285 |
| 8                | 1                | 0              | 0.000000                | -2.133027 | 0.453002  |
| 9                | 1                | 0              | 0.000000                | -2.133349 | -2.011221 |
| 10               | 6                | 0              | 0.000000                | 0.000000  | 2.044350  |
| 11               | 7                | 0              | 0.000000                | 0.000000  | 3.180782  |
| 12               | 6                | 0              | 0.000000                | 0.000000  | -2.164225 |
| 13               | 1                | 0              | 0.000000                | 0.000000  | -3.239288 |

### Hydrogen (H<sub>2</sub>)

$$E_0 = E_{elec} + ZPE = -1.116243$$

$$H = E + RT = -1.112938$$

| Center<br>Number | Atomic<br>Number | Atomic<br>Type | Coordinates (Angstroms) |          |           |
|------------------|------------------|----------------|-------------------------|----------|-----------|
|                  |                  |                | X                       | Y        | Z         |
| 1                | 1                | 0              | 0.000000                | 0.000000 | 0.364980  |
| 2                | 1                | 0              | 0.000000                | 0.000000 | -0.364980 |



### SI.1.2. Harmonic oscillator model of aromaticity (HOMA)

HOMA is structural based index for measuring aromaticity and it defined by Kruszewski and Krygowski [2] as following equation.

$$\text{HOMA} = 1 - \frac{\alpha}{n} \sum_{i=1}^n (R_{opt} - R_i)^2$$

According to the equation,  $\alpha$ ,  $n$ ,  $R_{opt}$  and  $R_i$  are empirical constant, the number of bonds determined, optimal value and individual bond length, respectively. The values of  $\alpha$  and  $R_{opt}$  for C-C benzene ring are 257.7 and 1.388, respectively [3]. The value of  $n$  is 6 since phenyl ring (ring A) has 6 bonds. The values for  $R_i$  were obtained from our optimized structures which is listed in Table S1. HOMA = 1 indicates the system has all equal bond and full delocalization (benzene-like) whereas HOMA = 0 shows the system with completely localized system. Note that we were not able to measure the HOMA value of ring B since  $\alpha$  and  $R_{opt}$  values for B-O bond are not available.

**Table S1. The C-C bond length values for all 6 bond in ring A**

| Number | COF-1   | CTF-1   | TPG     |
|--------|---------|---------|---------|
| 1      | 1.38315 | 1.38100 | 1.38128 |
| 2      | 1.39519 | 1.39108 | 1.39373 |
| 3      | 1.39518 | 1.39117 | 1.39374 |
| 4      | 1.38310 | 1.38102 | 1.38119 |
| 5      | 1.39518 | 1.39117 | 1.39374 |
| 6      | 1.39519 | 1.39108 | 1.39373 |

### SI.1.3. NICS-X-scan

The optimized structures were considered with the aim of finding aromatic property of the pore. First, COF-1, CTF-1 and TPG sheets were set perpendicular on z-axis, then ghost atoms (Bq) were situated from centre (0.0 Å) to near the pore wall (5.0 Å) with 0.1 Å distancing next each other along the x-axis [4]. Afterward, a NMR=GIAO calculation was implemented as same as optimization level and basis set, HF/6-31G(d). Consequently, isotropic values for Bq atoms (multiplied by -1) were recorded and were arranged in Table S2.

**Table S2. NICS<sub>iso</sub> values for COF-1, CTF-1 and TPG over the x-axis**

| Distance from centre<br>of pore (Å) | COF-1  | CTF-1  | TPG    |
|-------------------------------------|--------|--------|--------|
| 5.0                                 | 2.0600 | 2.8316 | 2.4801 |
| 4.9                                 | 2.0038 | 2.7777 | 2.4549 |
| 4.8                                 | 1.9491 | 2.7077 | 2.4058 |
| 4.7                                 | 1.8959 | 2.6302 | 2.3432 |
| 4.6                                 | 1.8436 | 2.5502 | 2.2736 |
| 4.5                                 | 1.7921 | 2.4703 | 2.2005 |
| 4.4                                 | 1.7411 | 2.3918 | 2.1264 |
| 4.3                                 | 1.6906 | 2.3150 | 2.0528 |
| 4.2                                 | 1.6405 | 2.2398 | 1.9806 |
| 4.1                                 | 1.5910 | 2.1662 | 1.9106 |
| 4.0                                 | 1.5424 | 2.0942 | 1.8431 |
| 3.9                                 | 1.4949 | 2.0240 | 1.7785 |
| 3.8                                 | 1.4488 | 1.9557 | 1.7171 |
| 3.7                                 | 1.4043 | 1.8895 | 1.6588 |
| 3.6                                 | 1.3616 | 1.8258 | 1.6039 |
| 3.5                                 | 1.3208 | 1.7648 | 1.5523 |
| 3.4                                 | 1.2821 | 1.7067 | 1.5039 |
| 3.3                                 | 1.2454 | 1.6516 | 1.4586 |
| 3.2                                 | 1.2109 | 1.5997 | 1.4164 |
| 3.1                                 | 1.1785 | 1.5510 | 1.3770 |
| 3.0                                 | 1.1480 | 1.5054 | 1.3404 |
| 2.9                                 | 1.1196 | 1.4629 | 1.3064 |
| 2.8                                 | 1.0929 | 1.4233 | 1.2748 |
| 2.7                                 | 1.0681 | 1.3865 | 1.2454 |
| 2.6                                 | 1.0449 | 1.3523 | 1.2181 |
| 2.5                                 | 1.0233 | 1.3206 | 1.1927 |
| 2.4                                 | 1.0031 | 1.2912 | 1.1692 |
| 2.3                                 | 0.9843 | 1.2640 | 1.1473 |
| 2.2                                 | 0.9669 | 1.2388 | 1.1271 |
| 2.1                                 | 0.9506 | 1.2155 | 1.1082 |
| 2.0                                 | 0.9355 | 1.1939 | 1.0908 |

|     |        |        |        |
|-----|--------|--------|--------|
| 1.9 | 0.9215 | 1.1739 | 1.0746 |
| 1.8 | 0.9085 | 1.1555 | 1.0596 |
| 1.7 | 0.8965 | 1.1385 | 1.0458 |
| 1.6 | 0.8854 | 1.1229 | 1.0330 |
| 1.5 | 0.8752 | 1.1085 | 1.0212 |
| 1.4 | 0.8658 | 1.0953 | 1.0104 |
| 1.3 | 0.8571 | 1.0832 | 1.0005 |
| 1.2 | 0.8493 | 1.0723 | 0.9915 |
| 1.1 | 0.8422 | 1.0623 | 0.9833 |
| 1.0 | 0.8358 | 1.0534 | 0.9759 |
| 0.9 | 0.8300 | 1.0454 | 0.9694 |
| 0.8 | 0.8249 | 1.0383 | 0.9635 |
| 0.7 | 0.8205 | 1.0322 | 0.9584 |
| 0.6 | 0.8167 | 1.0269 | 0.9540 |
| 0.5 | 0.8134 | 1.0224 | 0.9503 |
| 0.4 | 0.8108 | 1.0188 | 0.9473 |
| 0.3 | 0.8088 | 1.0160 | 0.9450 |
| 0.2 | 0.8074 | 1.0140 | 0.9433 |
| 0.1 | 0.8065 | 1.0128 | 0.9423 |
| 0.0 | 0.8062 | 1.0124 | 0.9420 |

---

#### SI.1.4. Partial atomic charges

The cluster structures used for calculation of partial atomic charges are presented in Figure S1, S2 and S3. The main parts of the solid sheets including one pore, the 6 trihedral connections resulting rings B as well as rings A were completely covered. Energy calculation using POP=Chelpg keyword was carried out at level of B3LYP with basis set of 6-31+G(d) [5]. The values for partial atomic charges obtained from electrostatic potential (EPS) fit were assigned for molecular dynamics (MD) simulations (Table S3, S4 and S5).

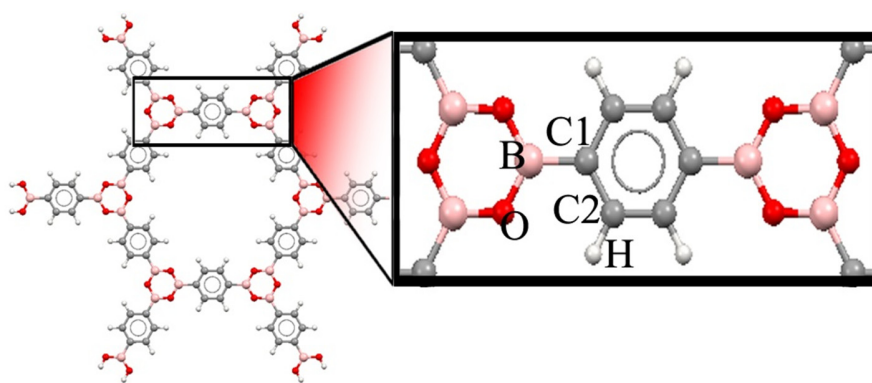

**Figure S1. COF-1 cluster structure applied for calculation of partial atomic charges. Oxygen, boron, carbon and hydrogen atoms are displayed in red, pink, gray and white spheres, respectively.**

**Table S3. Partial atomic charges values for COF-1 as given by ESP-fit based on B3LYP/6-31+G(d) method**

| Atom       | O       | B      | C1      | C2      | H      |
|------------|---------|--------|---------|---------|--------|
| Charge (e) | -0.7474 | 0.7793 | -0.1960 | -0.0920 | 0.1038 |

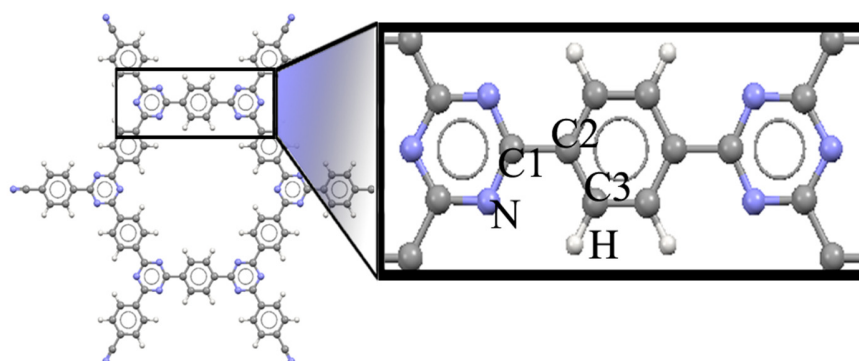

**Figure S2.** CTF-1 cluster structure applied for calculation of partial atomic charges. Nitrogen, carbon and hydrogen atoms are displayed in blue, gray and white spheres, respectively.

**Table S4.** Partial atomic charges values for CTF-1 as given by ESP-fit based on B3LYP/6-31+G(d) method

| Atom       | N       | C1     | C2      | C3      | H      |
|------------|---------|--------|---------|---------|--------|
| Charge (e) | -0.6869 | 0.6486 | -0.0559 | -0.0537 | 0.1045 |

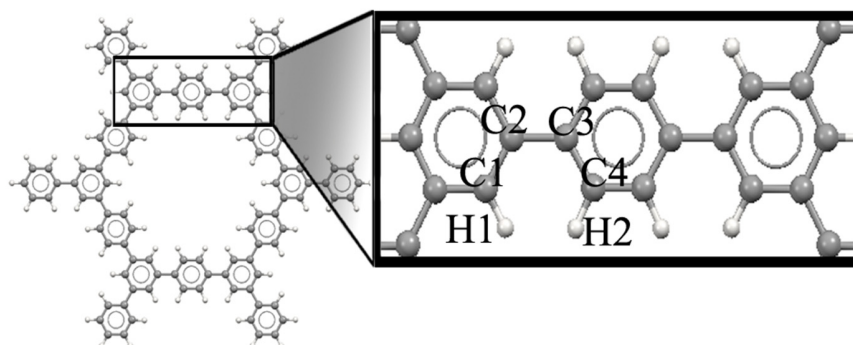

**Figure S3.** TPG cluster structure applied for calculation of partial atomic charges. Carbon and hydrogen atoms are displayed in gray and white spheres, respectively

**Table S5.** Partial atomic charges values for TPG as given by ESP-fit based on B3LYP/6-31+G(d) method

| Atom       | C1      | C2     | C3     | C4      | H1     |
|------------|---------|--------|--------|---------|--------|
| Charge (e) | -0.1226 | 0.0298 | 0.1658 | -0.1812 | 0.0493 |
| Atom       | H2      |        |        |         |        |
| Charge (e) | 0.1293  |        |        |         |        |

### SI.2.1. Super cell and unit cell of the solid sheets

$2 \times 2 \times 1$  super cell structures and the relevant unit cell for COF-1, CTF-1 and TPG are shown in Figure S4, S5, S6, respectively. However,  $1 \times 1 \times 1$  extended super cell structures have been used for this study.

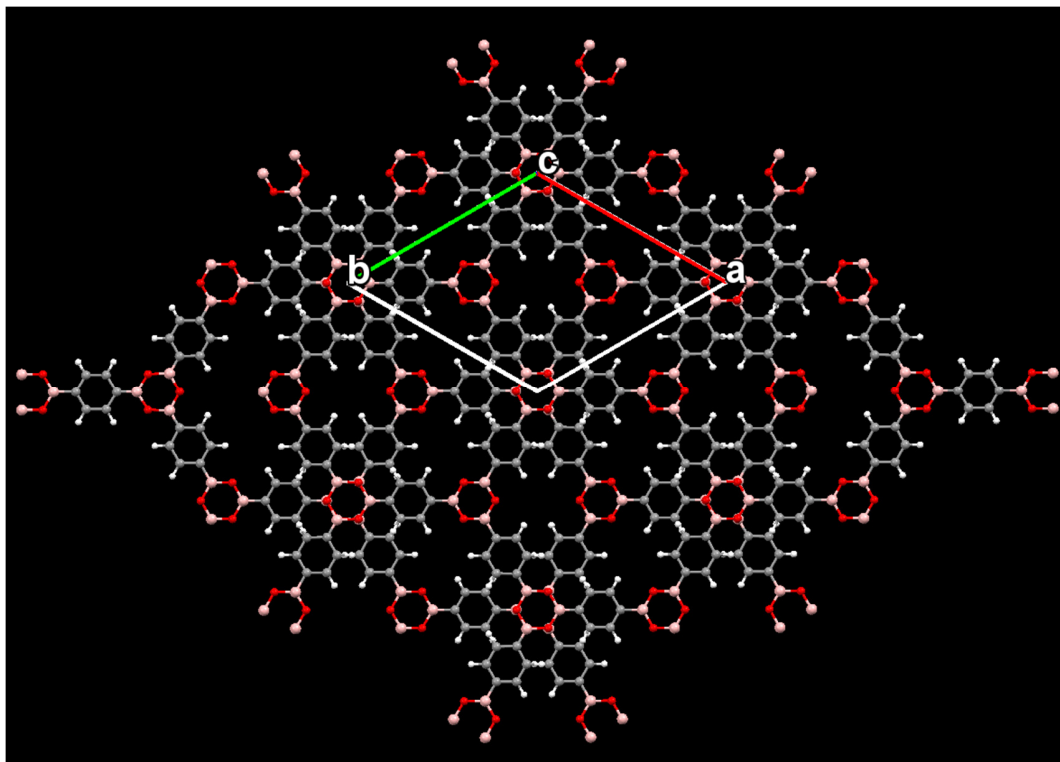

Figure S4.  $2 \times 2 \times 1$  extended super cell for COF-1 sheet

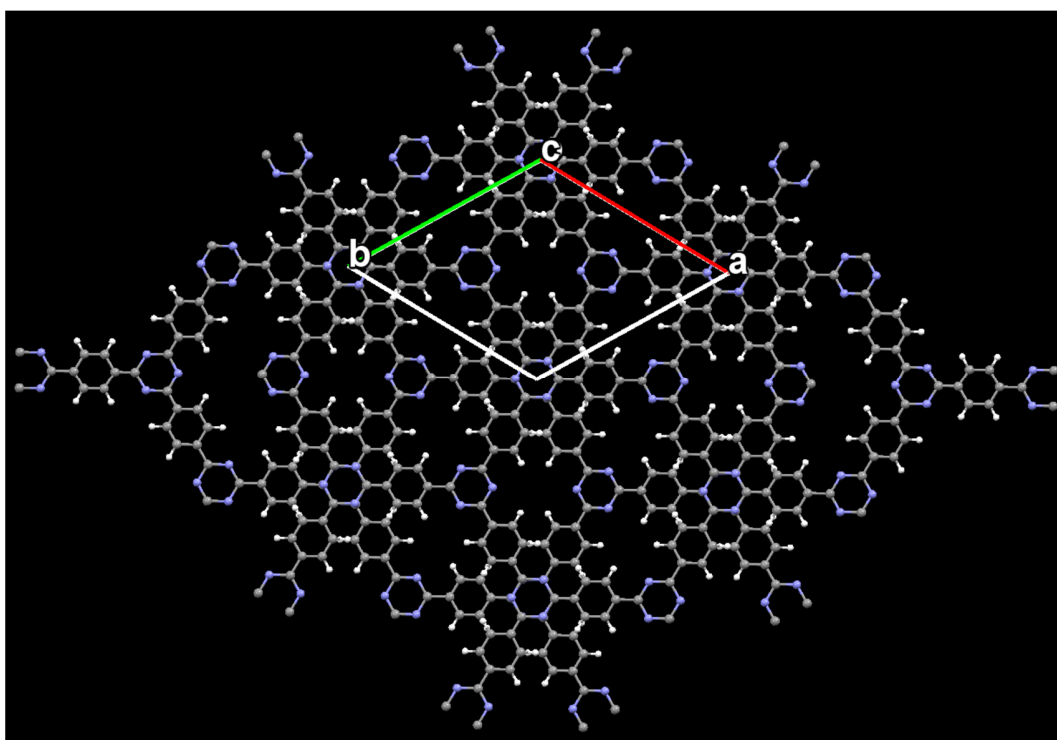

**Figure S5.  $2\times 2\times 1$  extended super cell for CTF-1 sheet**

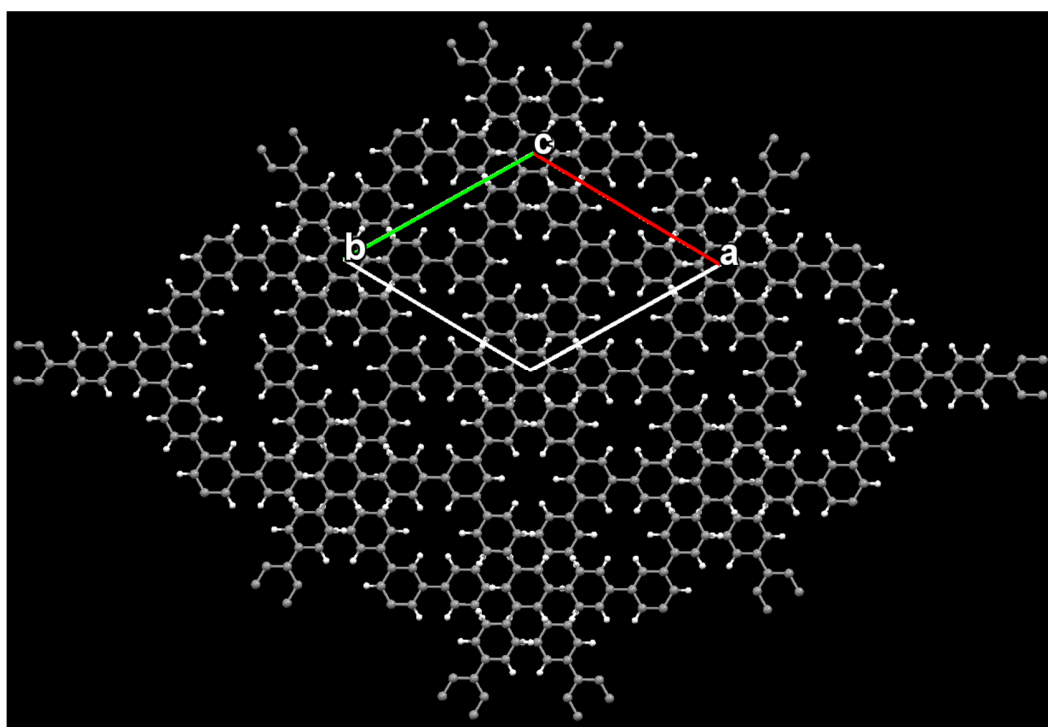

**Figure S6.  $2\times 2\times 1$  extended super cell for TPG sheet**

## SI.2.2. Potential parameters

**Table S6. Lennard-Jones potential parameters for COF-1, CTF-1 and TPG taken from OBGMX web-based server derived by UFF force field [6]**

| COF   | Atom type | $\sigma$ (nm) | $\varepsilon$ (kJ/mol) |
|-------|-----------|---------------|------------------------|
| COF-1 | B_2       | 0.3638        | 0.7536                 |
|       | O_2       | 0.3118        | 0.2512                 |
|       | C_R       | 0.3431        | 0.4396                 |
|       | H_        | 0.2571        | 0.1842                 |
|       | O_3       | 0.3118        | 0.2512                 |
| CTF-1 | C_R       | 0.3431        | 0.4396                 |
|       | C_2       | 0.3431        | 0.4396                 |
|       | N_R       | 0.3261        | 0.2889                 |
|       | N_2       | 0.3261        | 0.2889                 |
|       | H_        | 0.2571        | 0.1842                 |
|       | C_3       | 0.3431        | 0.4396                 |
| TPG   | C_R       | 0.3431        | 0.4396                 |
|       | C_2       | 0.3431        | 0.4396                 |
|       | H_        | 0.2571        | 0.1842                 |
|       | C_3       | 0.3431        | 0.4396                 |



### SI.2.3. Total energy

Maximum number of steps for energy minimization of the systems was determined by 50000 steps. The algorithm of steepest descent minimization was applied, and the run was stopped at 30674, 50000 and 50000 steps with the potential energy of  $-6.43 \times 10^4$ ,  $-6.60 \times 10^4$  and  $-6.48 \times 10^4$  kJ/mol for COF-1, CTF-1 and TPG, respectively. MD production of the systems was continued for 50 ns, after they were equilibrated at 300 K using NVT ensemble and at pressure of 1 bar using NPT ensemble. As plotted in Figure S7, the total energy values of the systems are not severely fluctuated, thus dynamics behavior of the water and ethanol molecules on the solid sheets can be calculated.

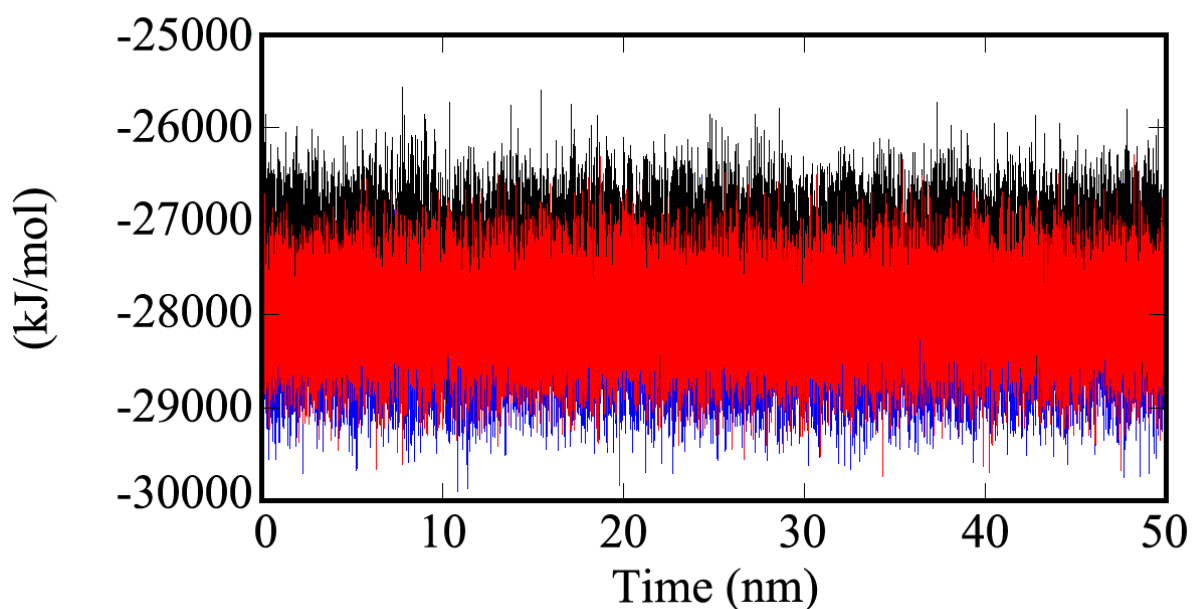

Figure S7. Calculated total energy of the systems; red, blue and black colors are represented for COF-1, CTF-1 and TPG

#### SI.2.4. Radial distribution function (RDF)

RDF is important tool for exploring the interaction of the considered molecules with various atoms on the surface of the solid sheets [7]. The RDF,  $g_{ij}(r)$ , is defined as the following equation:

$$g_{ij}(r) = \frac{N_{ij}(r, r + \Delta r) \cdot V}{4\pi r^2 \cdot \Delta r \cdot N_i \cdot N_j}$$

According to the equation  $N_{ij}(r, r + \Delta r)$  is the number of atom  $j$  around atom  $i$  within the area by the distance between  $r$  and  $r + \Delta r$ . Also,  $V$  is indicated for the volume of system and  $N$  is the number of atoms. All the calculated RDF graphs for COF-1, CTF-1 and TPG are shown in Figure S8, S9 and S10. Also, the maximum peak value and its distance (nm) for each RDF graph can be found in Table S7.

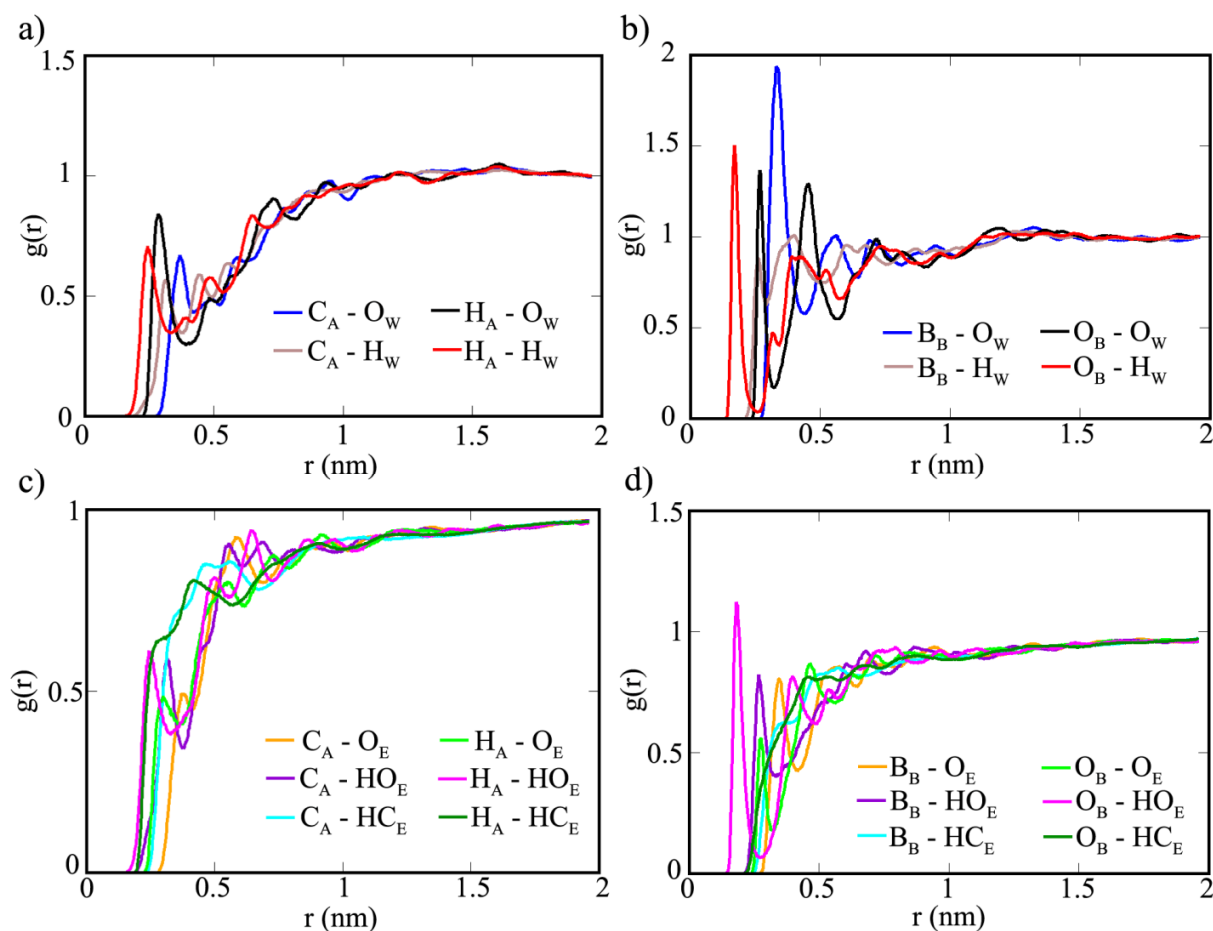

**Figure S8. RDF graphs for COF-1; a) between atoms in ring A and atoms in water, b) between atoms in ring B and atoms in water, c) between atoms in ring A and atoms in ethanol, and d) between atoms in ring B and atoms in ethanol**

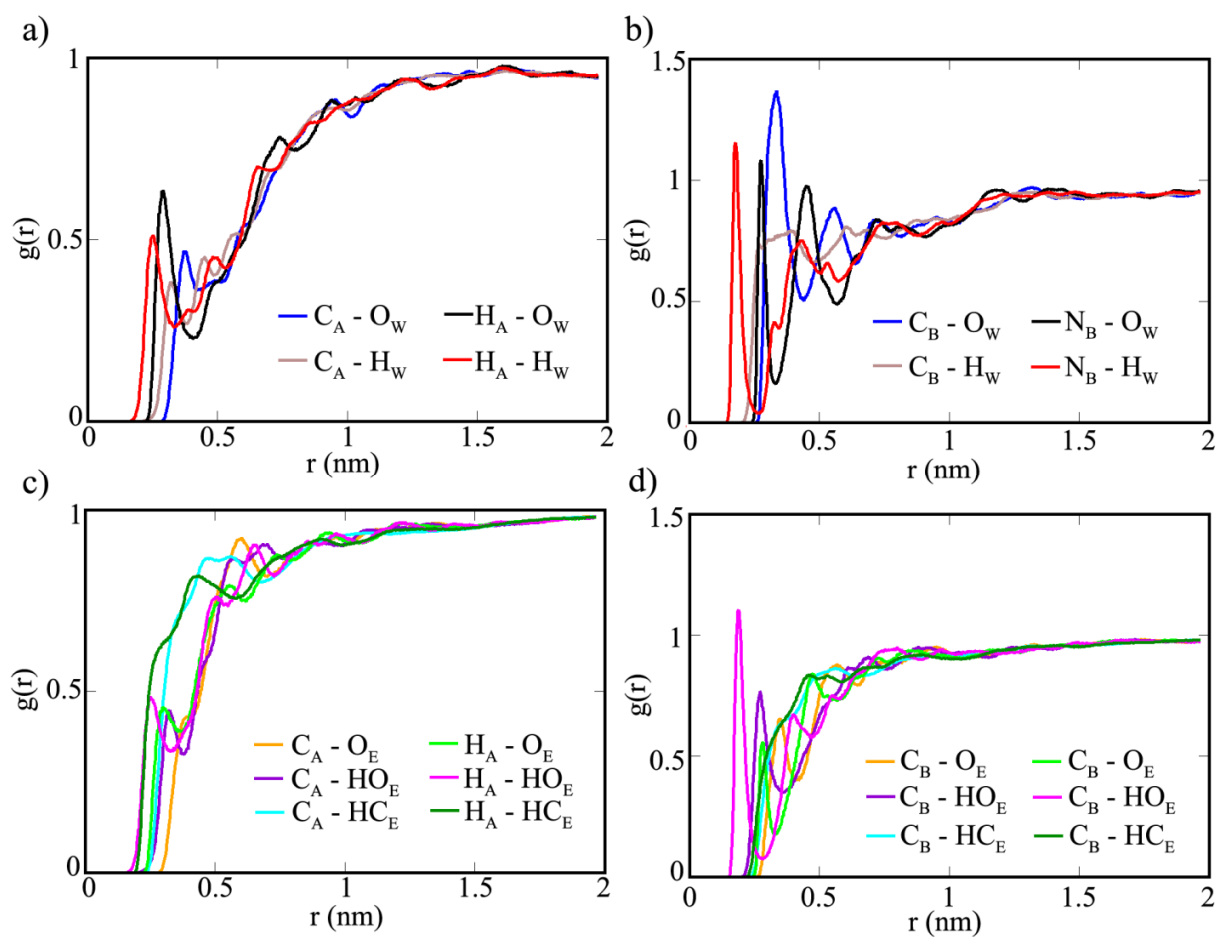

**Figure S9. RDF graphs for CTF-1; a) between atoms in ring A and atoms in water, b) between atoms in ring B and atoms in water, c) between atoms in ring A and atoms in ethanol, and d) between atoms in ring B and atoms in ethanol**

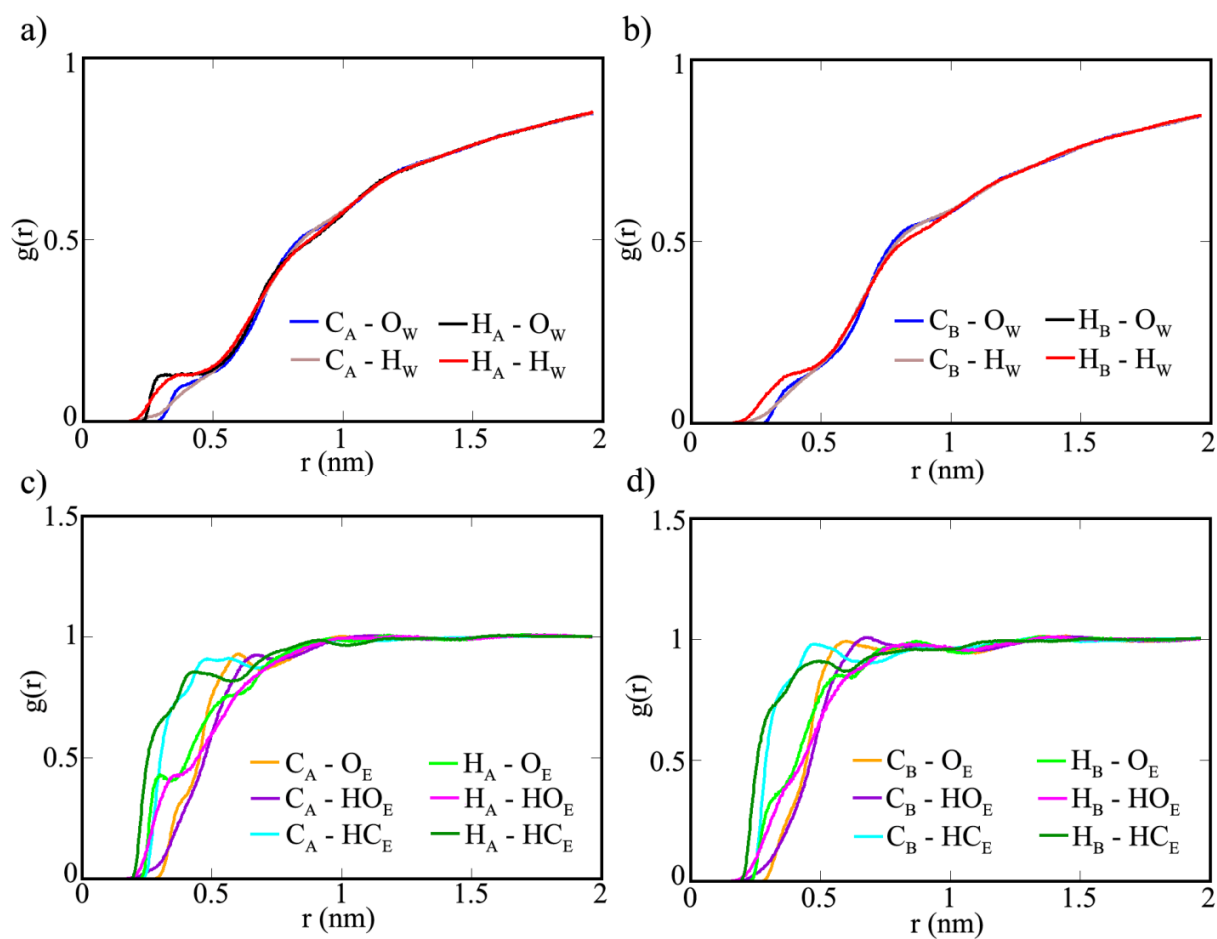

**Figure S10. RDF graphs for TPG; a) between atoms in ring A and atoms in water, b) between atoms in ring B and atoms in water, c) between atoms in ring A and atoms in ethanol, and d) between atoms in ring B and atoms in ethanol**

**Table S7. The maximum peak and its corresponding distance for each RDF**

| COF-1                                                   | CTF-1                                                   | TPG                                                         |
|---------------------------------------------------------|---------------------------------------------------------|-------------------------------------------------------------|
| <b>Ring A – water</b>                                   | <b>Ring A – water</b>                                   | <b>Ring A – water</b>                                       |
| C <sub>A</sub> – O <sub>water</sub> [1.03 in 1.6 nm]    | C <sub>A</sub> – O <sub>water</sub> [0.97 in 1.6 nm]    | C <sub>A</sub> – O <sub>water</sub> [0.85 in 1.9 nm]        |
| C <sub>A</sub> – H <sub>water</sub> [1.02 in 1.6 nm]    | C <sub>A</sub> – H <sub>water</sub> [0.96 in 1.6 nm]    | C <sub>A</sub> – H <sub>water</sub> [0.85 in 1.9 nm]        |
| H <sub>A</sub> – O <sub>water</sub> [1.05 in 1.6 nm]    | H <sub>A</sub> – O <sub>water</sub> [0.98 in 1.6 nm]    | H <sub>A</sub> – O <sub>water</sub> [0.85 in 1.9 nm]        |
| H <sub>A</sub> – H <sub>water</sub> [1.04 in 1.6 nm]    | H <sub>A</sub> – H <sub>water</sub> [0.97 in 1.6 nm]    | H <sub>A</sub> – H <sub>water</sub> [0.85 in 1.9 nm]        |
| <b>Ring B – water</b>                                   | <b>Ring B – water</b>                                   | <b>Ring B – water</b>                                       |
| B <sub>B</sub> – O <sub>water</sub> [1.94 in 0.3 nm]    | C <sub>B</sub> – O <sub>water</sub> [1.37 in 0.3 nm]    | C <sub>B</sub> – O <sub>water</sub> [0.84 in 1.9 nm]        |
| B <sub>B</sub> – H <sub>water</sub> [1.03 in 1.2 nm]    | C <sub>B</sub> – H <sub>water</sub> [0.95 in 1.3 nm]    | C <sub>B</sub> – H <sub>water</sub> [0.84 in 1.9 nm]        |
| O <sub>B</sub> – O <sub>water</sub> [1.37 in 0.3 nm]    | N <sub>B</sub> – O <sub>water</sub> [1.08 in 0.3 nm]    | H <sub>B</sub> – O <sub>water</sub> [0.84 in 1.9 nm]        |
| O <sub>B</sub> – H <sub>water</sub> [1.50 in 0.2 nm]    | N <sub>B</sub> – H <sub>water</sub> [1.15 in 0.2 nm]    | H <sub>B</sub> – H <sub>water</sub> [0.84 in 1.9 nm]        |
| <b>Ring A – ethanol</b>                                 | <b>Ring A – ethanol</b>                                 | <b>Ring A – ethanol</b>                                     |
| C <sub>A</sub> – O <sub>ethanol</sub> [0.97 in 1.9 nm]  | C <sub>A</sub> – O <sub>ethanol</sub> [0.98 in 1.9 nm]  | C <sub>A</sub> – O <sub>ethanol</sub> [1.00 in 1.7 nm]      |
| C <sub>A</sub> – HO <sub>ethanol</sub> [0.97 in 1.9 nm] | C <sub>A</sub> – HO <sub>ethanol</sub> [0.98 in 1.9 nm] | C <sub>A</sub> – HO <sub>ethanol</sub> [1.00 in 1.7 nm]     |
| C <sub>A</sub> – HC <sub>ethanol</sub> [0.97 in 1.9 nm] | C <sub>A</sub> – HC <sub>ethanol</sub> [0.98 in 1.9 nm] | C <sub>A</sub> – HC <sub>ethanol</sub> [1.00 in 1.7-1.9 nm] |
| H <sub>A</sub> – O <sub>ethanol</sub> [0.97 in 1.9 nm]  | H <sub>A</sub> – O <sub>ethanol</sub> [0.98 in 1.9 nm]  | H <sub>A</sub> – O <sub>ethanol</sub> [1.00 in 1.7 nm]      |
| H <sub>A</sub> – HO <sub>ethanol</sub> [0.97 in 1.8 nm] | H <sub>A</sub> – HO <sub>ethanol</sub> [0.98 in 1.9 nm] | H <sub>A</sub> – HO <sub>ethanol</sub> [1.00 in 1.7-1.8 nm] |
| H <sub>A</sub> – HC <sub>ethanol</sub> [0.97 in 1.9 nm] | H <sub>A</sub> – HC <sub>ethanol</sub> [0.98 in 1.9 nm] | H <sub>A</sub> – HC <sub>ethanol</sub> [1.00 in 1.6 nm]     |
| <b>Ring B – ethanol</b>                                 | <b>Ring B – ethanol</b>                                 | <b>Ring B – ethanol</b>                                     |
| B <sub>B</sub> – O <sub>ethanol</sub> [0.97 in 1.7 nm]  | C <sub>B</sub> – O <sub>ethanol</sub> [0.98 in 1.7 nm]  | C <sub>B</sub> – O <sub>ethanol</sub> [1.01 in 1.4 nm]      |
| B <sub>B</sub> – HO <sub>ethanol</sub> [0.97 in 1.7 nm] | C <sub>B</sub> – HO <sub>ethanol</sub> [0.98 in 1.7 nm] | C <sub>B</sub> – HO <sub>ethanol</sub> [1.01 in 1.4 nm]     |
| B <sub>B</sub> – HC <sub>ethanol</sub> [0.97 in 1.9 nm] | C <sub>B</sub> – HC <sub>ethanol</sub> [0.98 in 1.7 nm] | C <sub>B</sub> – HC <sub>ethanol</sub> [1.01 in 1.3 nm]     |
| O <sub>B</sub> – O <sub>ethanol</sub> [0.97 in 1.8 nm]  | N <sub>B</sub> – O <sub>ethanol</sub> [0.98 in 1.8 nm]  | H <sub>B</sub> – O <sub>ethanol</sub> [1.01 in 1.3 nm]      |
| O <sub>B</sub> – HO <sub>ethanol</sub> [1.12 in 0.2 nm] | N <sub>B</sub> – HO <sub>ethanol</sub> [1.10 in 0.2 nm] | H <sub>B</sub> – HO <sub>ethanol</sub> [1.01 in 1.3 nm]     |
| O <sub>B</sub> – HC <sub>ethanol</sub> [0.97 in 1.9 nm] | N <sub>B</sub> – HC <sub>ethanol</sub> [0.98 in 1.9 nm] | H <sub>B</sub> – HC <sub>ethanol</sub> [1.01 in 1.9 nm]     |

### SI.2.5. Average number of hydrogen bond (HB) interaction

**Table S8.**

| Surfaces | Ring/solvent   | Standard deviation    | HB interaction |
|----------|----------------|-----------------------|----------------|
| COF-1    | Ring A/Ethanol | 0.00                  | 0.00±0.00      |
|          | Ring B/Ethanol | $1.75 \times 10^{-2}$ | 8.70±0.28      |
|          | Ring A/Water   | 0.00                  | 0.00±0.00      |
|          | Ring B/Water   | $2.17 \times 10^{-2}$ | 17.03±0.49     |
| CTF-1    | Ring A/Ethanol | 0.00                  | 0.00±0.00      |
|          | Ring B/Ethanol | $1.83 \times 10^{-2}$ | 9.00±0.25      |
|          | Ring A/Water   | 0.00                  | 0.00±0.00      |
|          | Ring B/Water   | $2.46 \times 10^{-2}$ | 14.82±0.71     |
| TPG      | Ring A/Ethanol | 0.00                  | 0.00±0.00      |
|          | Ring B/Ethanol | 0.00                  | 0.00±0.00      |
|          | Ring A/Water   | 0.00                  | 0.00±0.00      |
|          | Ring B/Water   | 0.00                  | 0.00±0.00      |

### SI.2.6. Partial density

**Table S9.** The maximum and minimum values of partial density as well as their corresponding distance from centre of z-axis in COF-1, CTF-1 and TPG

| Solvent | COF-1                             | CTF-1                             | TPG                               |
|---------|-----------------------------------|-----------------------------------|-----------------------------------|
| Ethanol | Max:                              | Max:                              | Max:                              |
|         | 748 kg.m <sup>-3</sup> (0.49 nm)  | 769 kg.m <sup>-3</sup> (0.49 nm)  | 832 kg.m <sup>-3</sup> (0.49 nm)  |
|         | 756 kg.m <sup>-3</sup> (-0.49 nm) | 744 kg.m <sup>-3</sup> (-0.49 nm) | 813 kg.m <sup>-3</sup> (-0.49 nm) |
|         | Min:                              | Min:                              | Min:                              |
| Water   | 250 kg.m <sup>-3</sup> (0.07 nm)  | 259 kg.m <sup>-3</sup> (0.07 nm)  | 263 kg.m <sup>-3</sup> (0.07 nm)  |
|         | 243 kg.m <sup>-3</sup> (-0.07 nm) | 259 kg.m <sup>-3</sup> (-0.07 nm) | 261 kg.m <sup>-3</sup> (-0.07 nm) |
|         | Max:                              | Max:                              | Max:                              |
|         | 265 kg.m <sup>-3</sup> (0.91 nm)  | 269 kg.m <sup>-3</sup> (0.91 nm)  | 292 kg.m <sup>-3</sup> (3.43 nm)  |
| Water   | 267 kg.m <sup>-3</sup> (-0.91 nm) | 265 kg.m <sup>-3</sup> (2.89 nm)  | 290 kg.m <sup>-3</sup> (-3.43 nm) |
|         | Min:                              | Min:                              | Min:                              |
|         | 153 kg.m <sup>-3</sup> (0.21 nm)  | 127 kg.m <sup>-3</sup> (0.21 nm)  | 35 kg.m <sup>-3</sup> (0.07 nm)   |
|         | 158 kg.m <sup>-3</sup> (-0.21 nm) | 134 kg.m <sup>-3</sup> (-0.21 nm) | 37 kg.m <sup>-3</sup> (-0.07 nm)  |

### SI.2.7. Mean square displacement (MSD)

**Table S10.**

| Surfaces | MSD of ethanol<br>(10 <sup>-5</sup> cm <sup>2</sup> s <sup>-1</sup> ) | Standard<br>deviation | MSD of water<br>(10 <sup>-5</sup> cm <sup>2</sup> s <sup>-1</sup> ) | Standard<br>deviation |
|----------|-----------------------------------------------------------------------|-----------------------|---------------------------------------------------------------------|-----------------------|
| COF-1    | 0.61±0.07                                                             | 1.50×10 <sup>-1</sup> | 0.80±0.01                                                           | 1.95×10 <sup>-1</sup> |
| CTF-1    | 0.67±0.02                                                             | 1.64×10 <sup>-1</sup> | 0.82±0.02                                                           | 1.99×10 <sup>-1</sup> |
| TPG      | 0.57±0.02                                                             | 1.40×10 <sup>-1</sup> | 0.69±0.02                                                           | 1.67×10 <sup>-1</sup> |

## References

1. Baranac-Stojanovic, M. Cyclic  $\pi$  Electron Delocalization in Fluoroborazines. *J. Phys. Chem. A* **2013**, *117*, 11540–11547. [[doi.org/10.1021/jp407454x](https://doi.org/10.1021/jp407454x)]
2. Kruszewski, J.; Krygowski, T.M. Definition of aromaticity basing on the harmonic oscillator model. *Tetrahedron Lett.* **1972**, *13*, 3839–3842. [[doi.org/10.1016/S0040-4039\(01\)94175-9](https://doi.org/10.1016/S0040-4039(01)94175-9)]
3. Fallah-Bagher-Shaidaei, H.; Farkhonde, R.; Navideh, L.G. Aromaticity of topological isomers of cyclazines and their [14] to [18] annulenes. *Comput. Theor. Chem.* **2011**, *963*, 525–532. [[doi.org/10.1016/j.comptc.2010.11.027](https://doi.org/10.1016/j.comptc.2010.11.027)]
4. Schaffroth, M.; Gershoni-Poranne, R.; Stanger, A.; Bunz, U.H.F. Tetraazaacenes Containing Four-Membered Rings in Different Oxidation States. Are They Aromatic? A Computational Study. *J. Org. Chem.* **2014**, *79*, 11644–11650. [[doi.org/10.1021/jo502297w](https://doi.org/10.1021/jo502297w)]
5. Kotzabasaki, M.; Galdadas, I.; Tylianakis, E.; Klontzas, E.; Cournia, Z.; Froudakis, G.E. Multiscale simulations reveal IRMOF-74-III as a potent drug carrier for gemcitabine delivery. *J. Mater. Chem. B* **2017**, *5*, 3277–3282. [[doi.org/10.1039/C7TB00220C](https://doi.org/10.1039/C7TB00220C)]
6. Garberoglio, G. OBGMX: A web-based generator of GROMACS topologies for molecular and periodic systems using the universal force field. *J. Comput. Chem.* **2012**, *33*, 2204–2208. [[doi.org/10.1002/jcc.23049](https://doi.org/10.1002/jcc.23049)]
7. Xu, P.; Lang, X.; Fan, S.; Wang, Y.; Chen, J. Molecular dynamics simulation of methane hydrate growth in the presence of the natural product pectin. *J. Phys. Chem. C* **2016**, *120*, 5392–5397. [[doi.org/10.1021/acs.jpcc.5b10342](https://doi.org/10.1021/acs.jpcc.5b10342)]
